# Supplementary material for: A quantitative inventory of yeast P body proteins reveals principles of composition and specificity
Source: eLife journal article supplement (doi:10.7554/elife.56525), 2020-06-19
Supplement: supp [file elife-56525-supp-v1.zip]

Archive with 16 entries (16 files):
- elife_poa_e56525_Transparent_Reporting_File.docx
- elife_poa_e56525_Figure_1_figure_supplement_1.pdf
- elife_poa_e56525_Figure_1_figure_supplement_2.pdf
- elife_poa_e56525_Figure_1_figure_supplement_3.pdf
- elife_poa_e56525_Figure_2_figure_supplement_1.pdf
- elife_poa_e56525_Figure_2_figure_supplement_2.pdf
- elife_poa_e56525_Figure_2_figure_supplement_3.pdf
- elife_poa_e56525_Figure_2_figure_supplement_4.pdf
- elife_poa_e56525_Figure_4_figure_supplement_1.pdf
- elife_poa_e56525_Figure_5_figure_supplement_1.pdf
- elife_poa_e56525_Figure_6_figure_supplement_1.pdf
- elife_poa_e56525_Figure_7_figure_supplement_1.pdf
- elife_poa_e56525_Supplementary_file_1.xlsx
- elife_poa_e56525_Supplementary_file_2.docx
- elife_poa_e56525_Supplementary_file_3.xlsx
- elife_poa_e56525_Supplementary_file_4.xlsx
