# Supplementary material for: A quantitative inventory of yeast P body proteins reveals principles of composition and specificity
Source: eLife journal article supplement (doi:10.7554/elife.56525), 2020-06-19
Supplement: supp [file elife-56525-supp-v1.zip › elife_poa_e56525_Figure_1_figure_supplement_1.pdf]

# Figure 1 - figure supplement 1

**A**

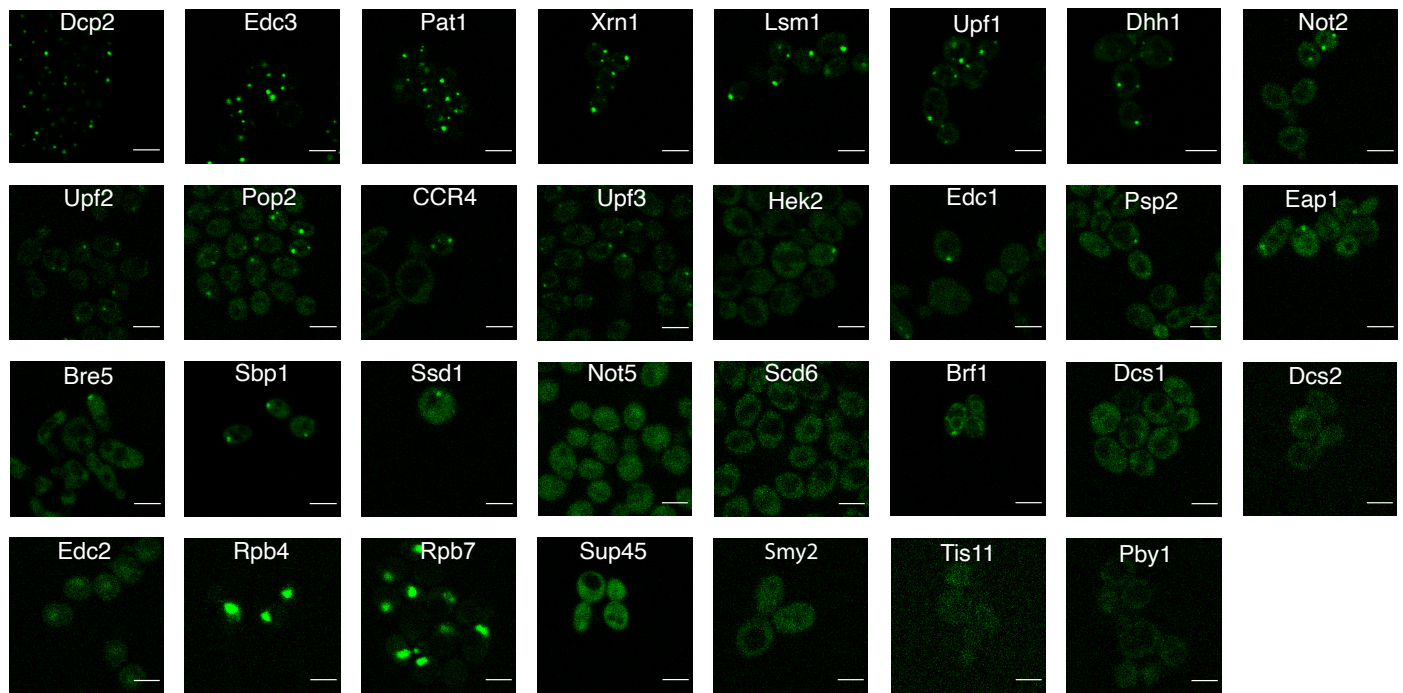

**B**

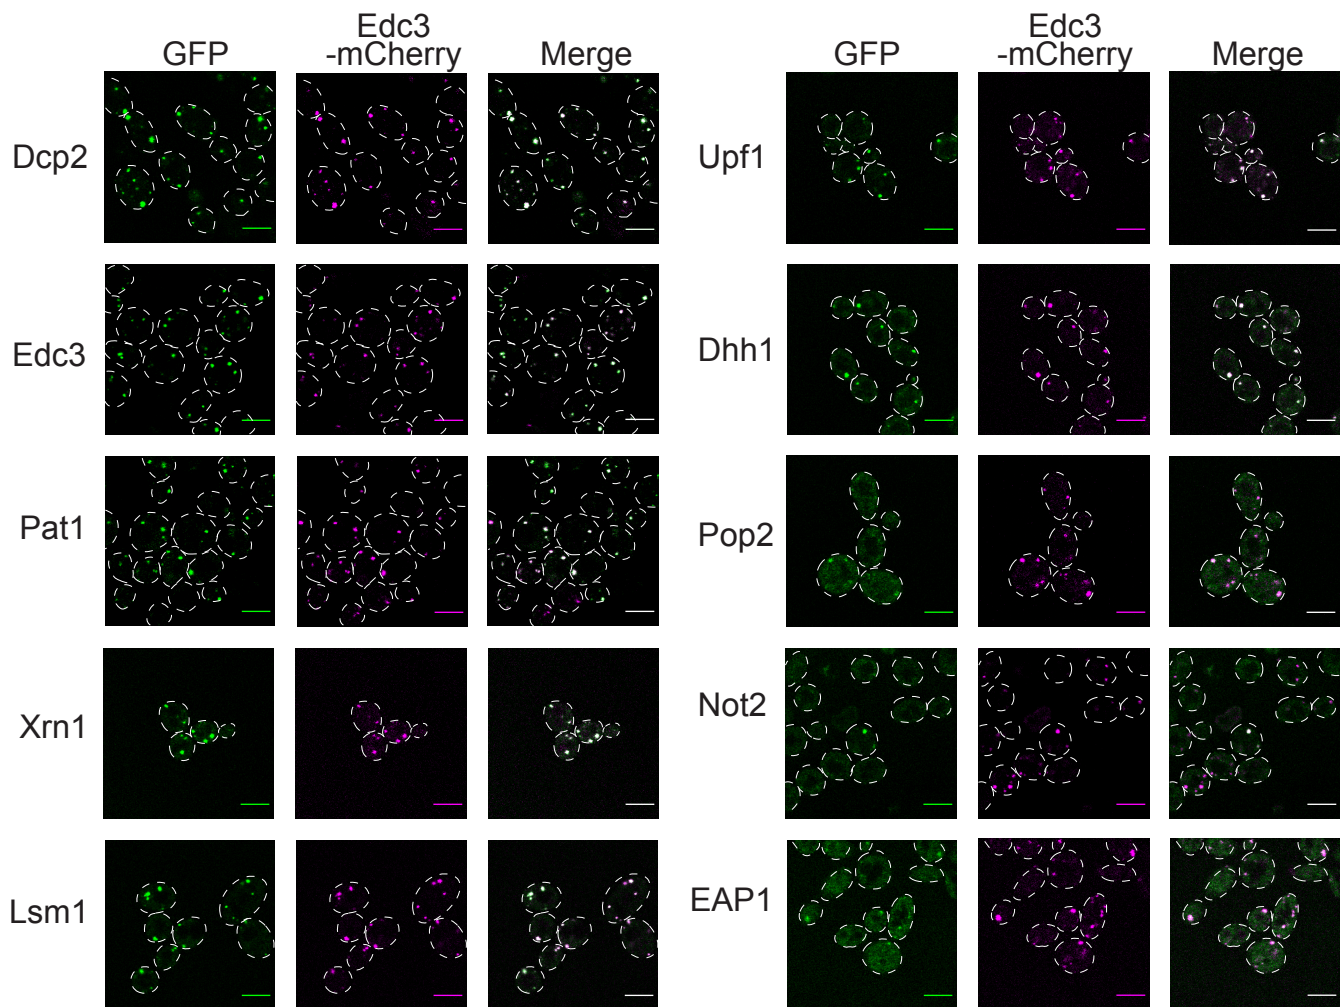

**Figure 1 – figure supplement 1. Punctate localization of GFP tagged proteins and co-localization with P body marker.**

(A) Confocal fluorescence microscopy images of 31 P body proteins fused to GFP expressed in *dcp1Δ* strain in log-phase. Scale bar, 5 μm.

(B) Fluorescence microscopy images of yeast co-expressing Edc3-mcherry and selected GFP-fused P body proteins. Scale bar, 5 μm
