# Supplementary material for: A quantitative inventory of yeast P body proteins reveals principles of composition and specificity
Source: eLife journal article supplement (doi:10.7554/elife.56525), 2020-06-19
Supplement: supp [file elife-56525-supp-v1.zip › elife_poa_e56525_Figure_1_figure_supplement_3.pdf]

## Figure 1 - figure supplement 3

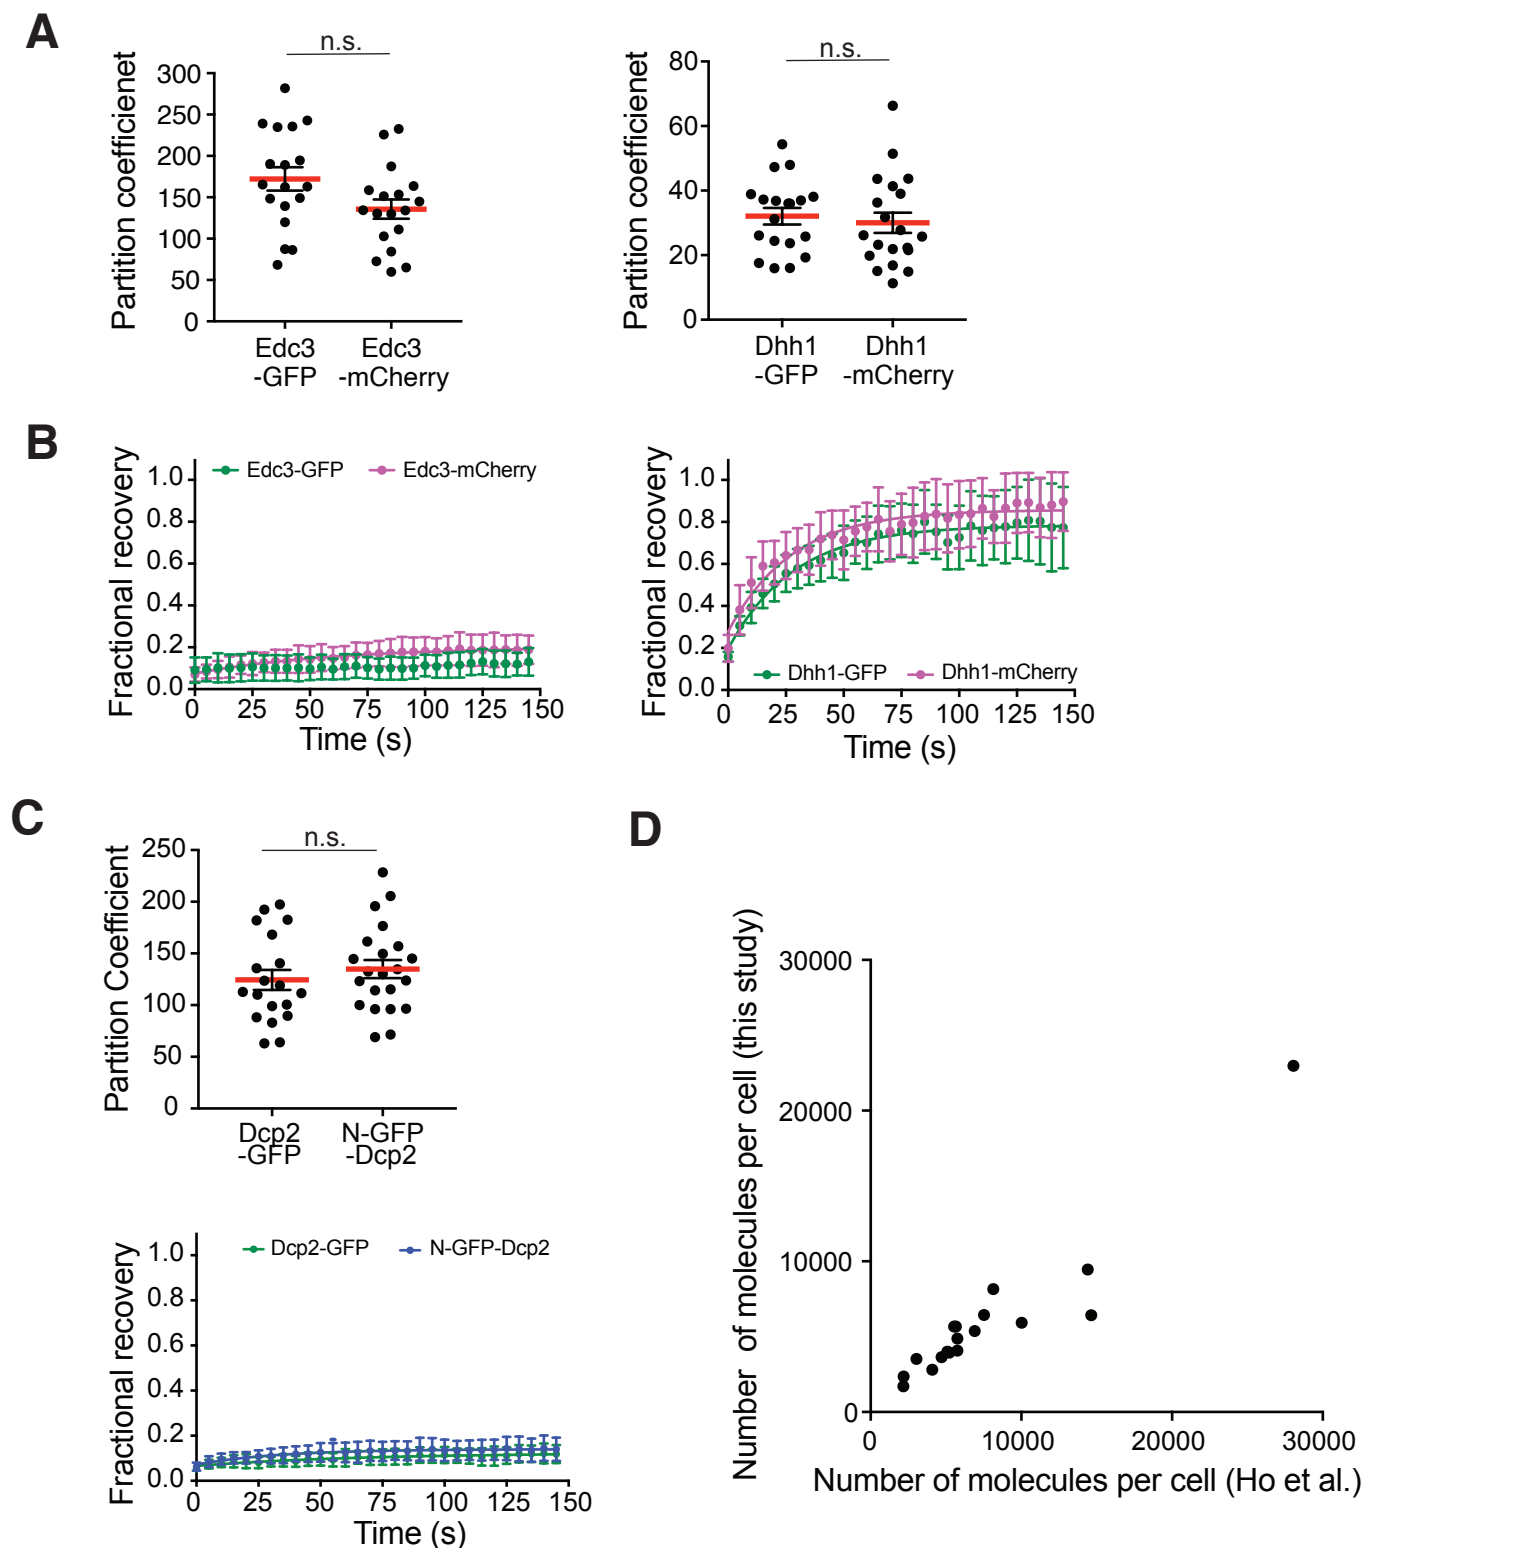

**Figure 1 – figure supplement 3. Verification of quantitative measurements.**

(A) A C-terminal GFP tag does not affect protein partitioning into P bodies. Plots show PC values (black dots) and means (red line)  $\pm$  SEM when Edc3 and Dhh1 tagged at their C-termini with either GFP or mCherry. Each dot represents an individual P body in one cell. 18 - 20 cells were analyzed. Significance was calculated using the Wilcoxon rank-sum test.

(B) A C-terminal GFP tag does not affect protein dynamics. Recovery curve of C-terminal GFP- or mCherry-tagged Edc3 and Dhh1 as an average of 20 P bodies  $\pm$  SD.

(C) Location of the GFP tag does not affect partitioning or dynamics of Dcp2. Dcp2 was tagged with GFP at either its N- (N-GFP-Dcp2) or C-terminus (Dcp2-GFP). Top: PCs (black dots) and mean value (red line)  $\pm$  SEM. Significance was calculated by Wilcoxon rank-sum test. Bottom: recovery curve as an average of 20 P bodies  $\pm$  SD.

(D) Comparison of protein abundance (molecules per cell) measured in this study to previous unified database (Ho et al., 2018).
