# Supplementary material for: A quantitative inventory of yeast P body proteins reveals principles of composition and specificity
Source: eLife journal article supplement (doi:10.7554/elife.56525), 2020-06-19
Supplement: supp [file elife-56525-supp-v1.zip › elife_poa_e56525_Figure_2_figure_supplement_1.pdf]

# Figure 2 - figure supplement 1

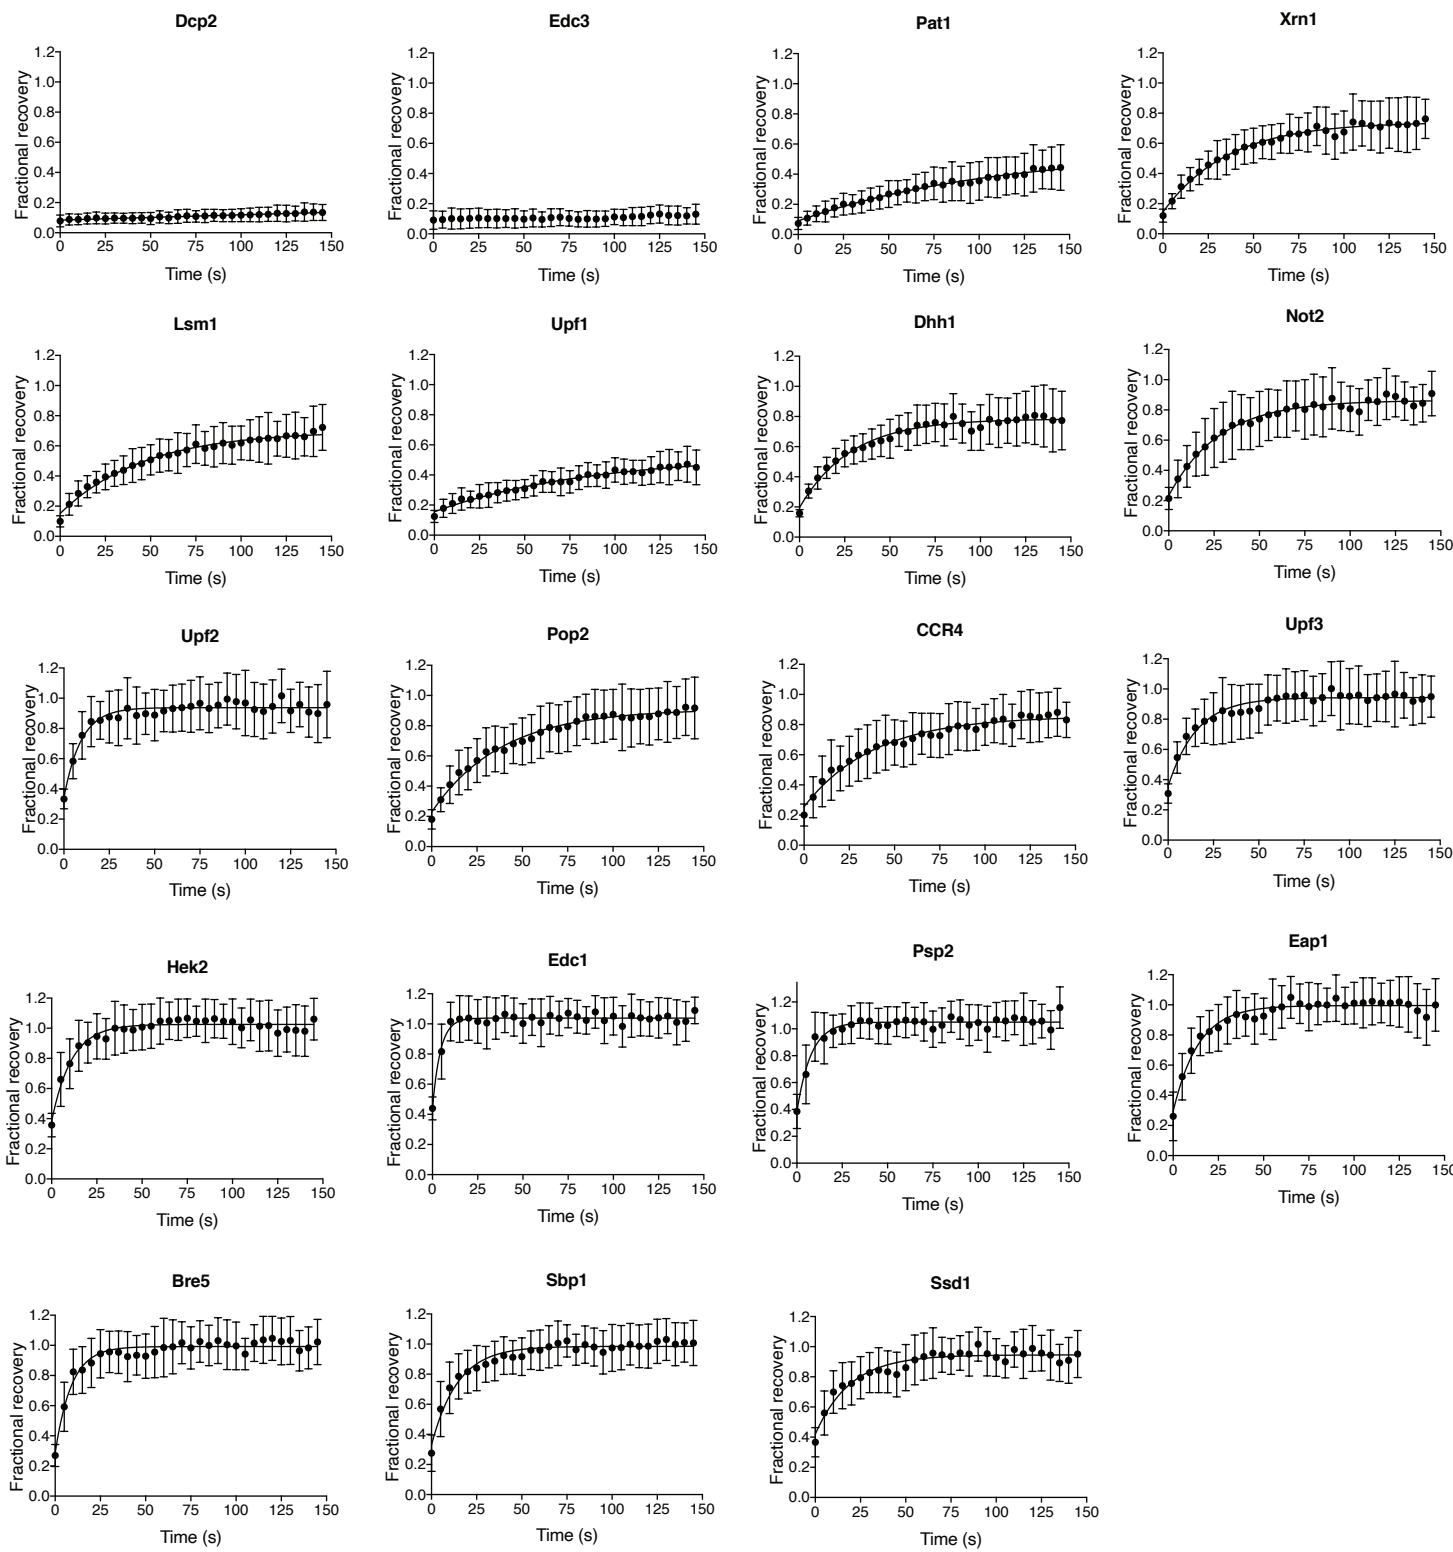

**Figure 2 – figure supplement 1. FRAP recovery curves of 19 P body proteins.**  
FRAP recovery curves of 19 P body proteins reported as average of 16 - 25 P bodies  $\pm$  SD.
