# Supplementary material for: A quantitative inventory of yeast P body proteins reveals principles of composition and specificity
Source: eLife journal article supplement (doi:10.7554/elife.56525), 2020-06-19
Supplement: supp [file elife-56525-supp-v1.zip › elife_poa_e56525_Figure_2_figure_supplement_2.pdf]

## Figure 2 - figure supplement 2

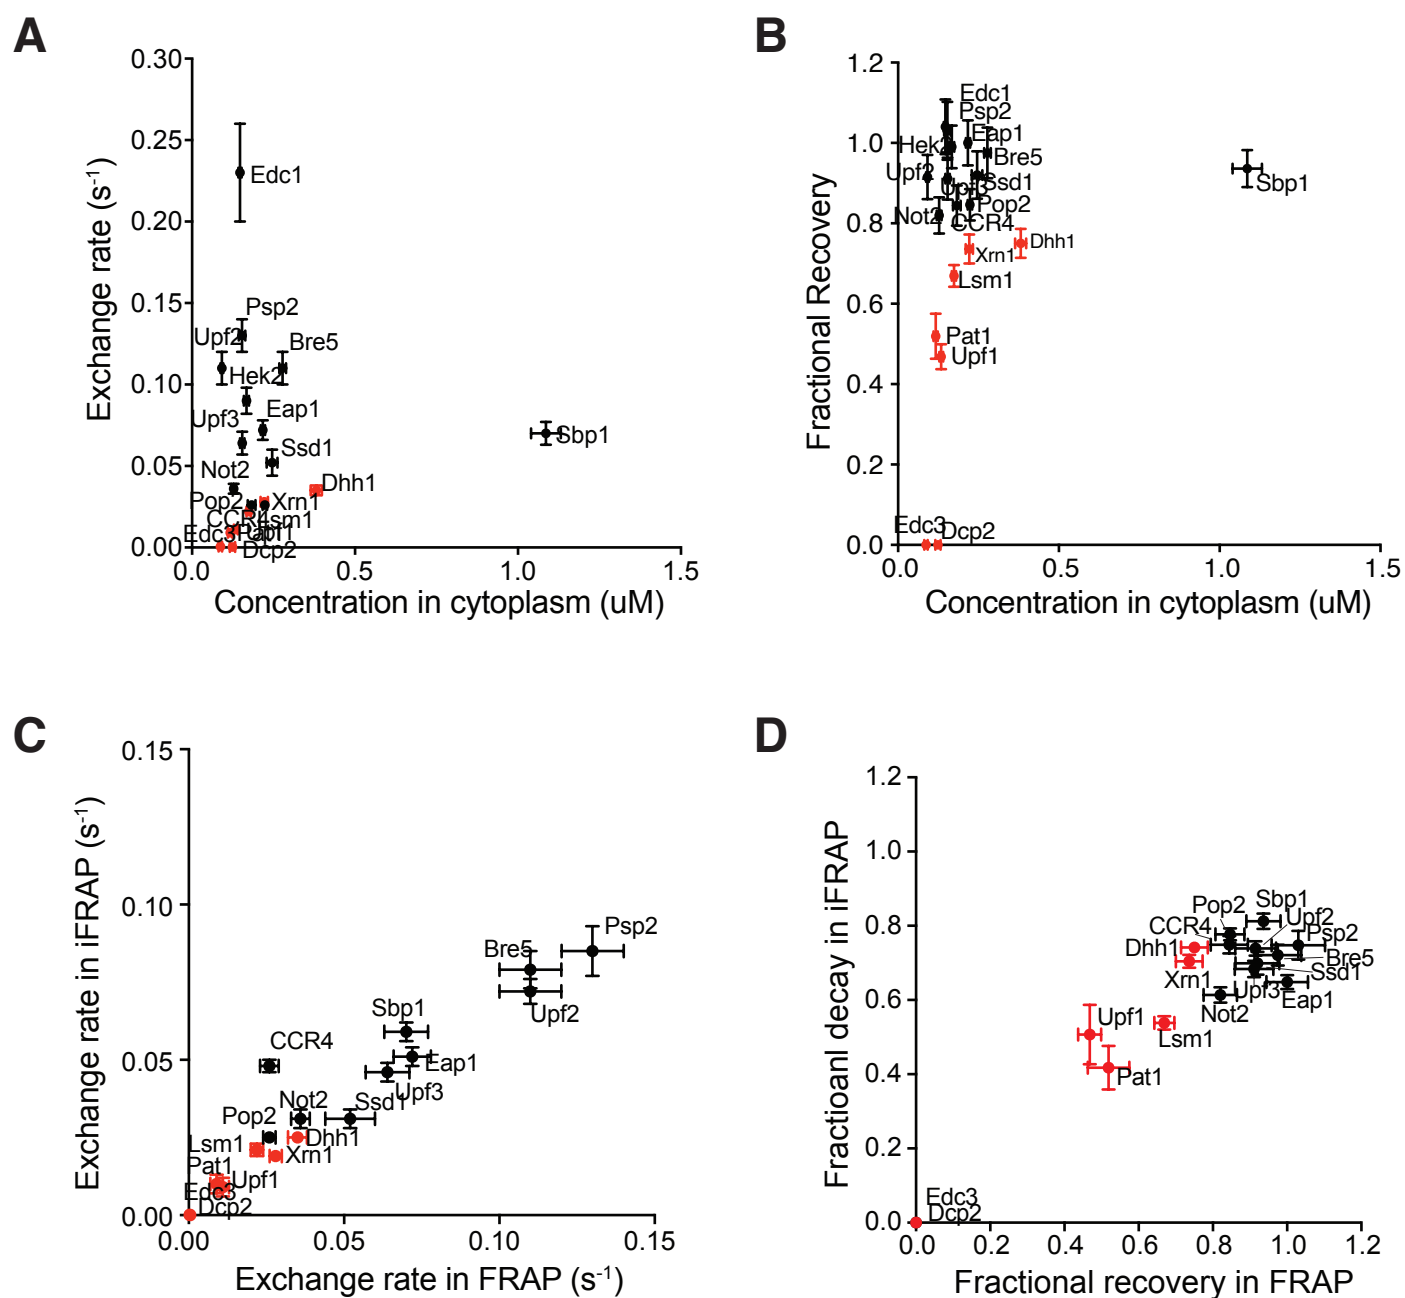

**Figure 2 – figure supplement 2. Slow dynamics are not caused by smaller fluorescence pool in cytoplasm.**

(A/B) Exchange rate (A) or fractional recovery (B) is not correlated with protein concentrations in cytoplasm. Exchange rate or fractional recovery (mean  $\pm$  SEM) were plotted as a function of absolute concentrations in cytoplasm (mean  $\pm$  SEM), respectively. HC and LC proteins are indicated by red and black symbols, respectively.

(C/D) Exchange rate (C) or fractional decay (D) measured by iFRAP (16-20 cells measured for each protein) are qualitatively similar to values measured using FRAP. The fractional decay of more rapidly exchanging proteins measured by iFRAP is systematically smaller than measured using FRAP due to the longer time to bleach the whole cytoplasm in the former experiments. HC and LC proteins are indicated by red and black symbols, respectively. Pearson correlation coefficients were calculated in Prism (GraphPad).
