# Supplementary material for: A quantitative inventory of yeast P body proteins reveals principles of composition and specificity
Source: eLife journal article supplement (doi:10.7554/elife.56525), 2020-06-19
Supplement: supp [file elife-56525-supp-v1.zip › elife_poa_e56525_Figure_2_figure_supplement_3.pdf]

**Figure 2 - figure supplement 3**

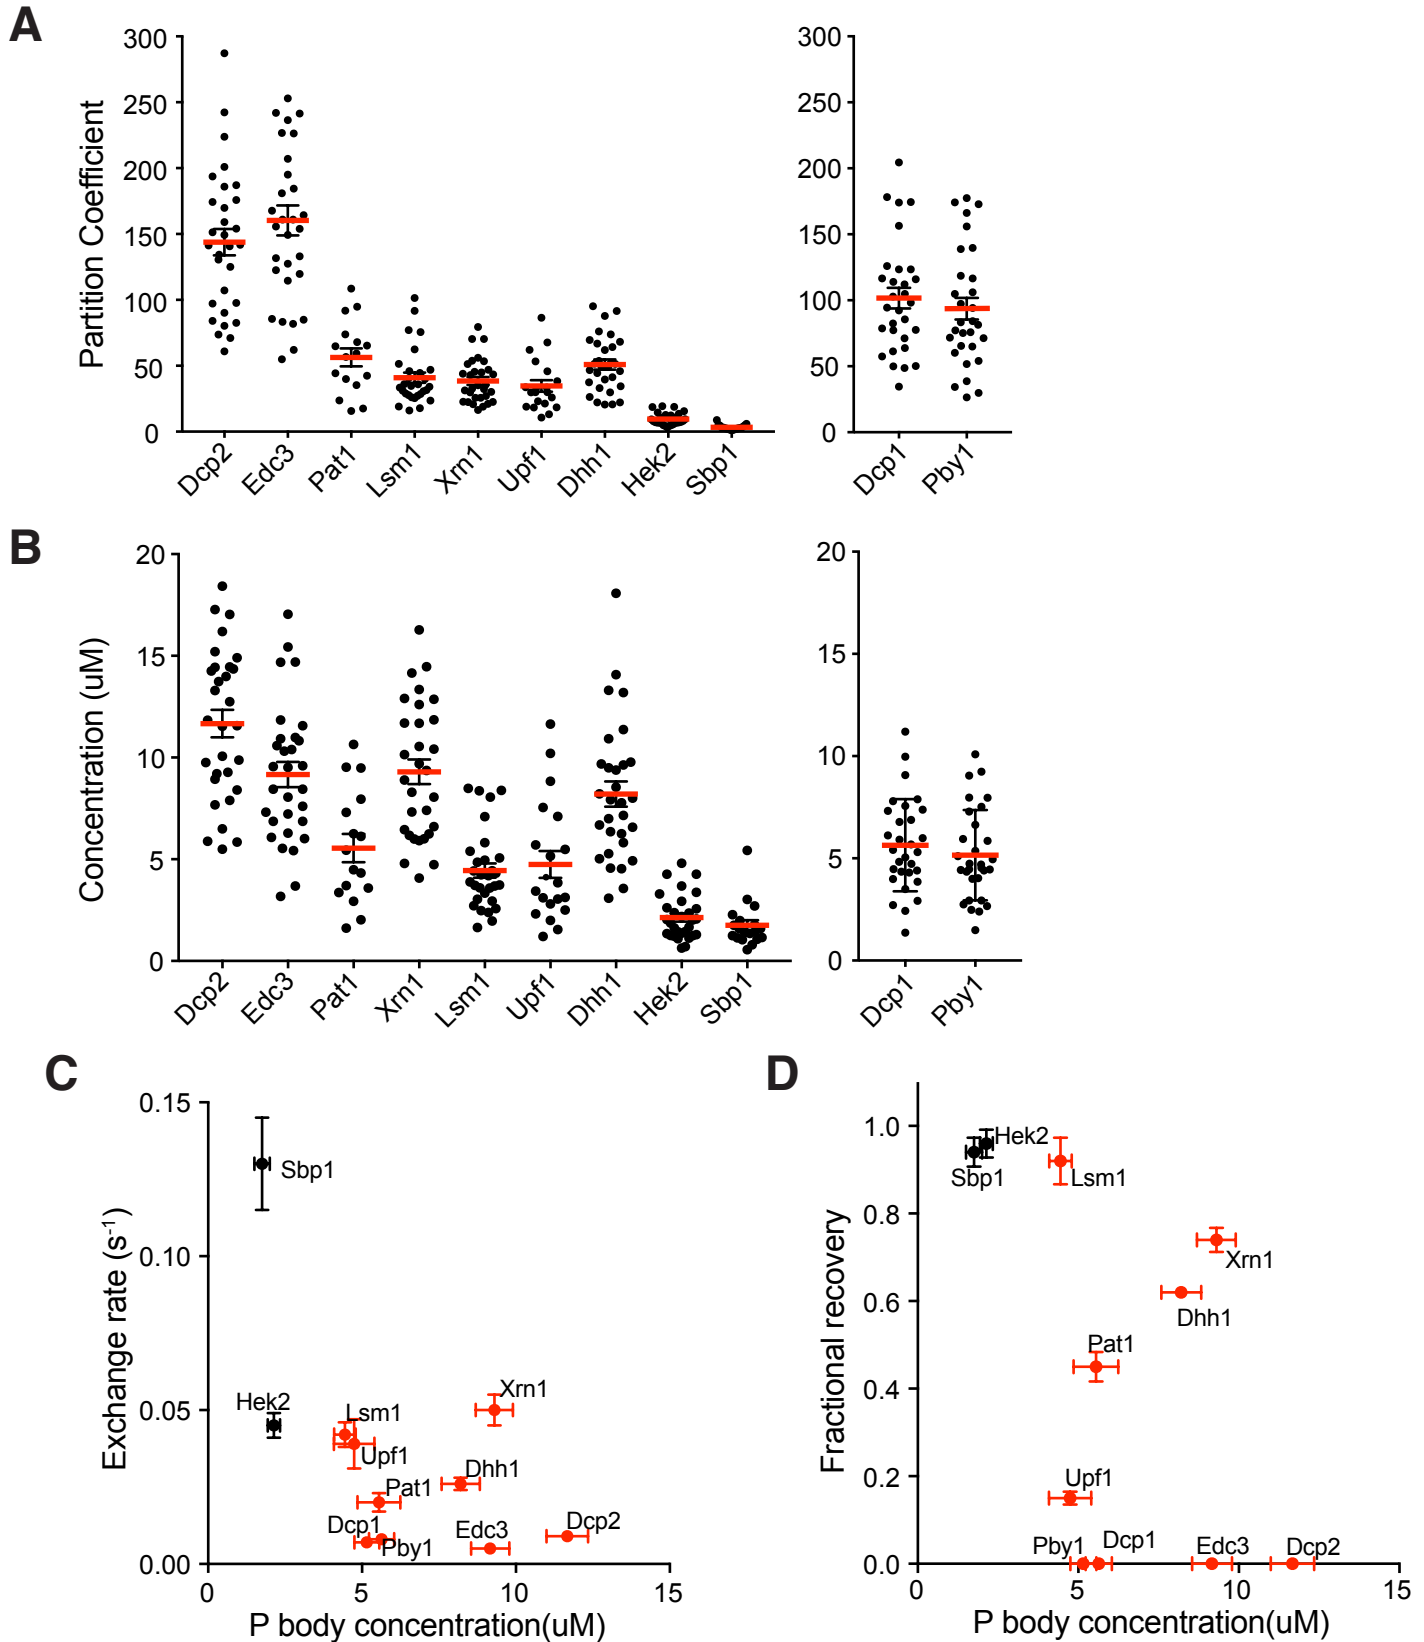

**Figure 2 – figure supplement 3. Partitioning and dynamics of P body proteins in wild type strains under glucose starvation are qualitatively similar to *dcp1 $\Delta$*  strains.**

(A/B) Partition coefficients (A) or absolute concentrations (B) in P bodies in wild type strains under 30-60 min glucose starvation. Plots show PC values, and absolute concentrations in P bodies (black dots) and mean values (red line)  $\pm$  SEM. Each dot represents an individual P body in one cell. We analyzed 20 - 30 cells for each protein. Left, proteins found in both wild type and *dcp1 $\Delta$*  strains ordered by their PC in *dcp1 $\Delta$*  strains. Right, proteins only found in P bodies in wild type strains.

(C/D) Exchange rate (C) or fractional recovery (D) was plotted as a function of absolute concentrations in P bodies (mean  $\pm$  SEM). HC and LC proteins are indicated by red and black symbols, respectively.
