# Supplementary material for: A quantitative inventory of yeast P body proteins reveals principles of composition and specificity
Source: eLife journal article supplement (doi:10.7554/elife.56525), 2020-06-19
Supplement: supp [file elife-56525-supp-v1.zip › elife_poa_e56525_Figure_2_figure_supplement_4.pdf]

Figure 2 - figure supplement 4

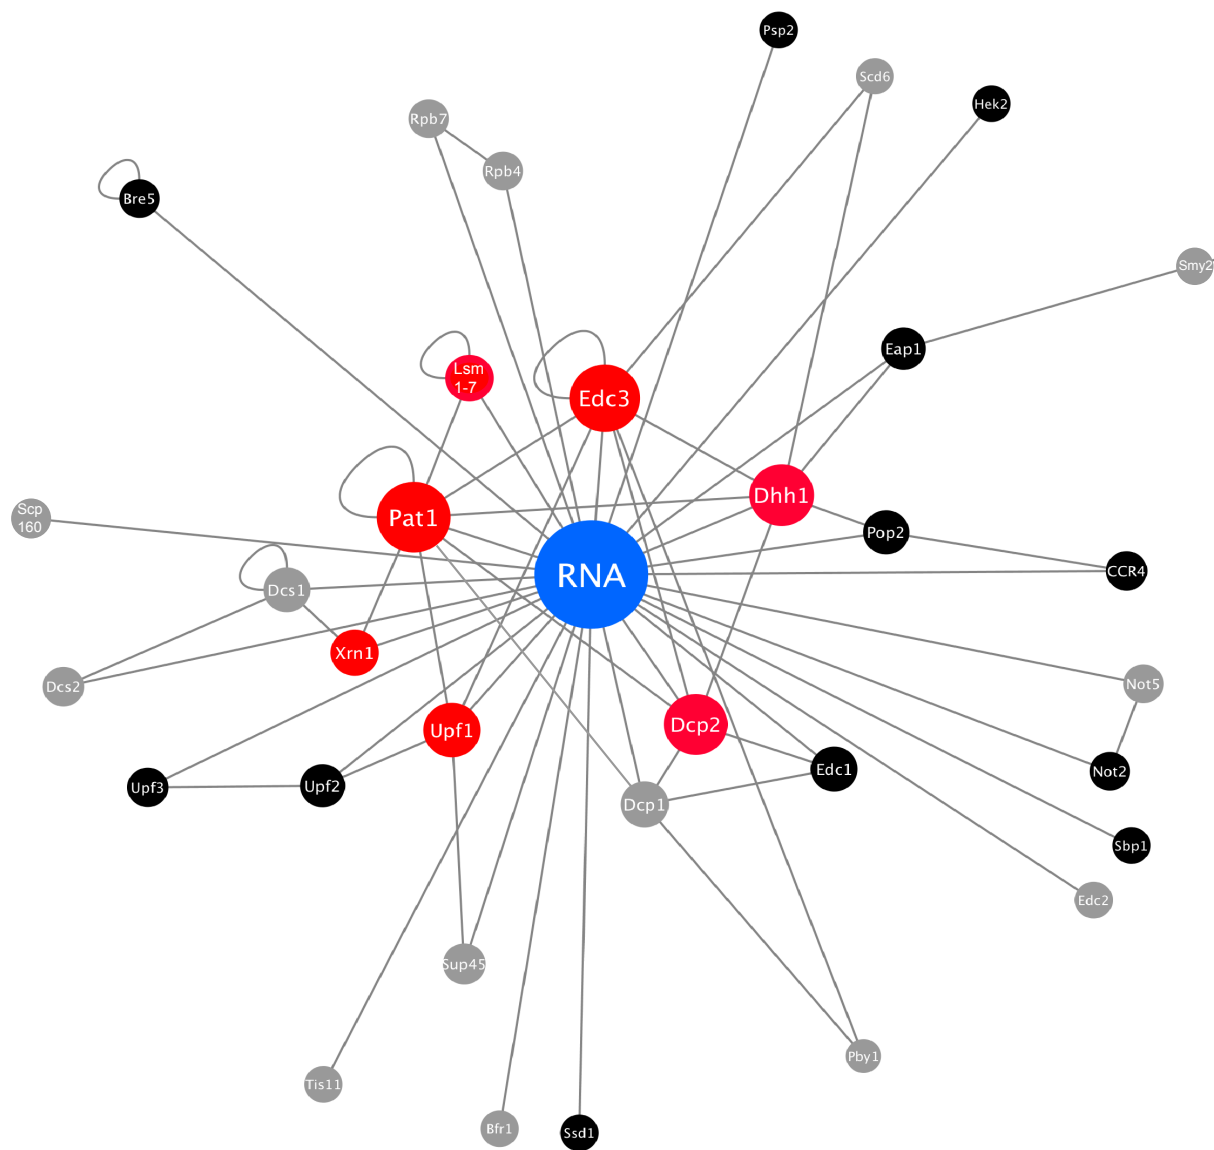

**Figure 2 – figure supplement 4. Protein-protein and protein-RNA connections among regular P body proteins.** Protein-protein and protein-RNA interactions are summarized from literatures as shown in Table 3. Red, HC P body proteins. Black, LC P body proteins. Grey, 12 P body proteins that lacked clear punctate localization in our studies. Size of node and distance of other nodes to RNA node reflect its centrality.
