# Supplementary material for: A quantitative inventory of yeast P body proteins reveals principles of composition and specificity
Source: eLife journal article supplement (doi:10.7554/elife.56525), 2020-06-19
Supplement: supp [file elife-56525-supp-v1.zip › elife_poa_e56525_Figure_4_figure_supplement_1.pdf]

## Figure 4 - figure supplement 1

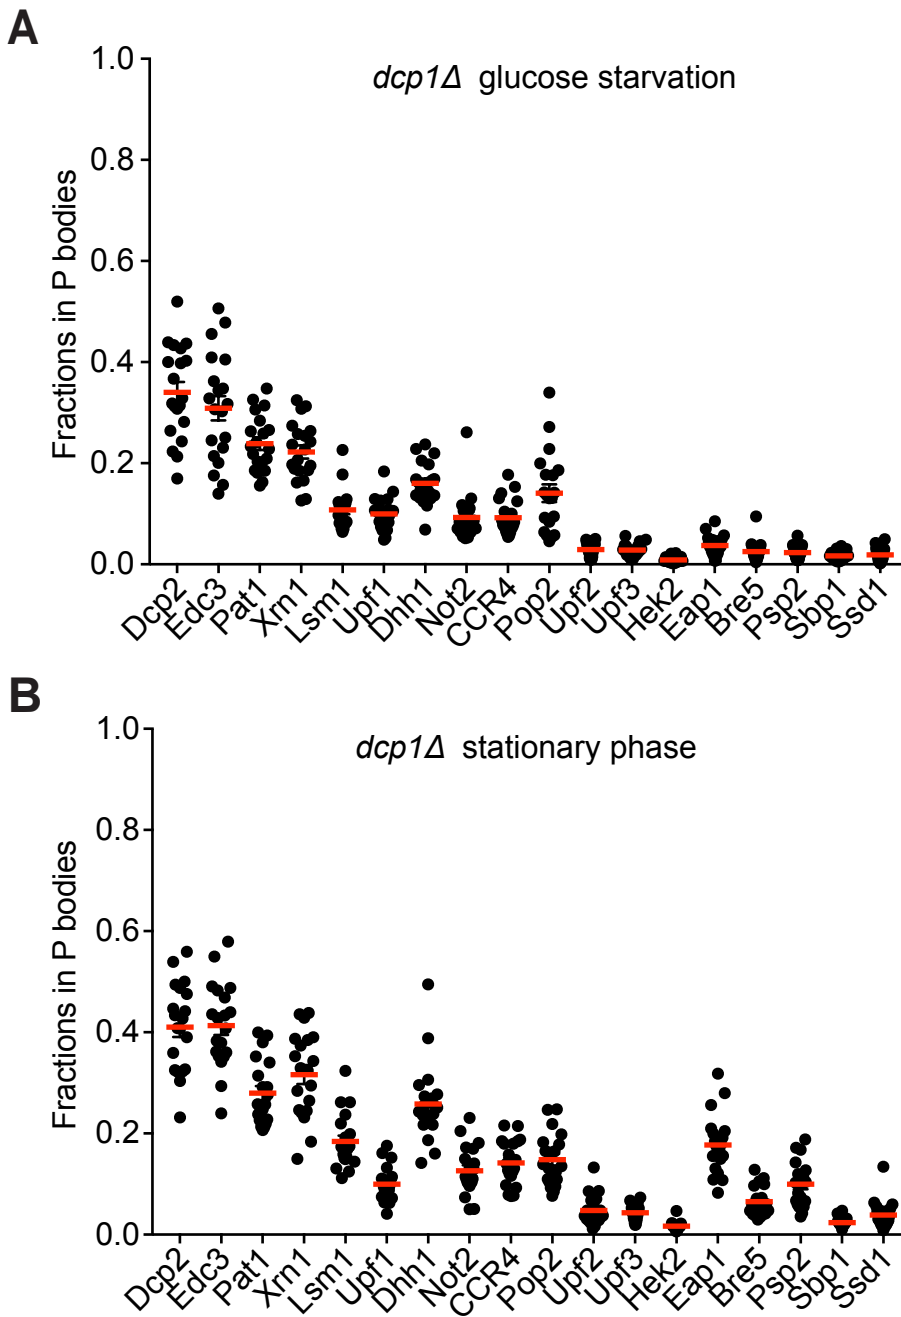

**Figure 4 – figure supplement 1. P bodies do not strongly sequester their resident proteins.**

(A) Fractions of total protein localized to P bodies (black dots) and mean values (red lines)  $\pm$  SEM in *dcp1Δ* strains. Cells were grown to mid-log phase followed by 4h glucose starvation.

(B) Fractions of total protein localized to P bodies (black dots) and mean values (red lines)  $\pm$  SEM in *dcp1Δ* strains in stationary phase. In A and B, each dot corresponds to an individual cell, and 20 cells were analyzed for each protein.
