# Supplementary material for: A quantitative inventory of yeast P body proteins reveals principles of composition and specificity
Source: eLife journal article supplement (doi:10.7554/elife.56525), 2020-06-19
Supplement: supp [file elife-56525-supp-v1.zip › elife_poa_e56525_Figure_5_figure_supplement_1.pdf]

## Figure 5 - figure supplement 1

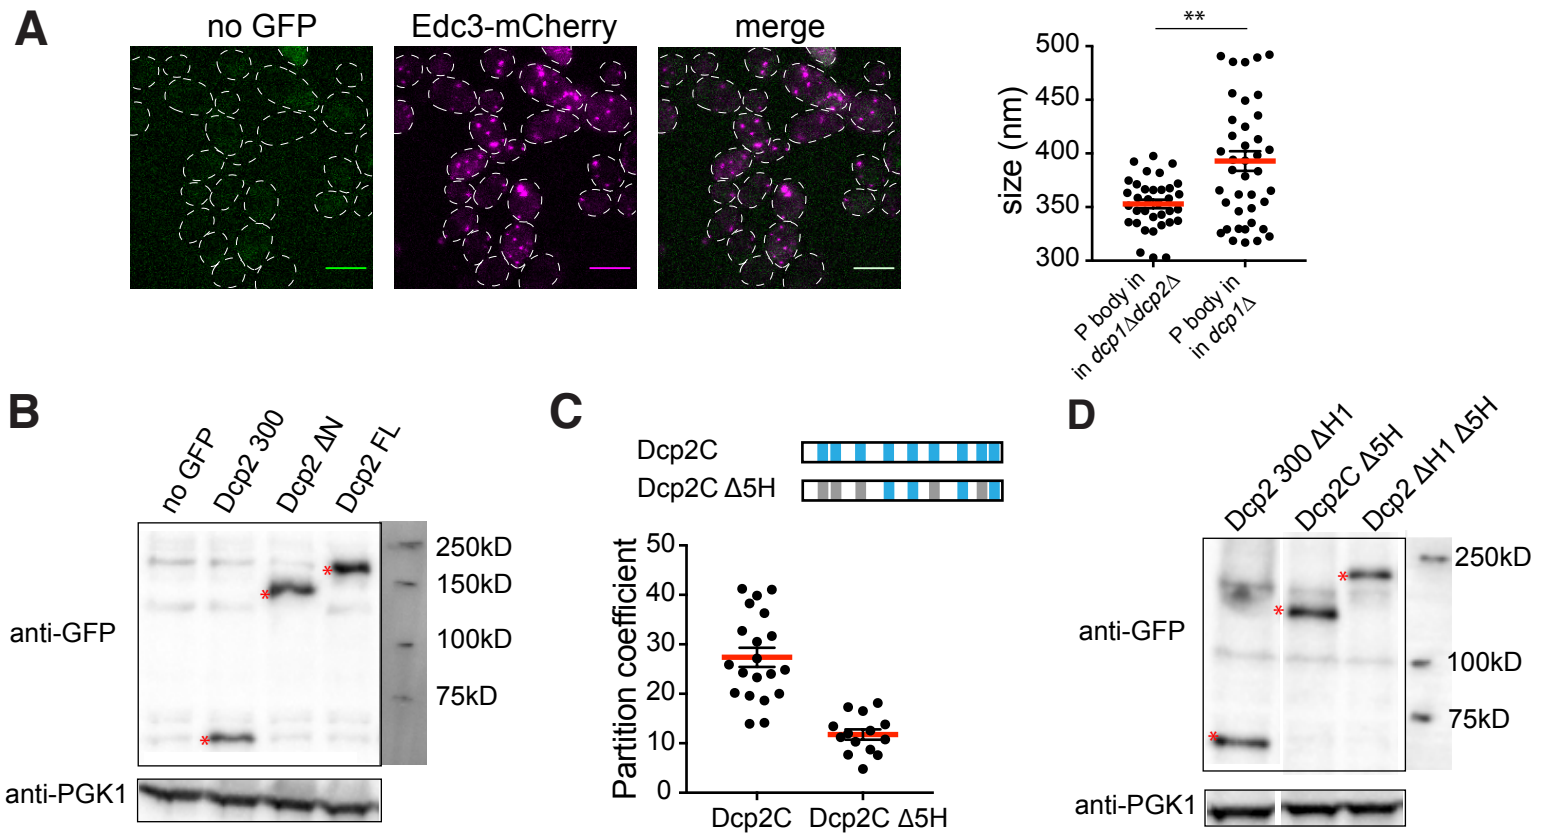

**Figure 5 – figure supplement 1.**

(A) Representative images of *dcp1Δdcp2Δ* yeast expressing Edc3-mCherry as a P body marker. Scale bar, 5  $\mu$ m.

Plot shows size of P body in *dcp1Δdcp2Δ* (n= 34) and *dcp1Δ* strains (n= 40)  $\pm$  SEM.

(B) Western blot of Dcp2 FL, Dcp2 300, and Dcp2 ΔN in *dcp1Δdcp2Δ* strain shows that they expressed at similar levels.

(C) Dcp2C Δ5H partitions into P bodies more weakly than Dcp2C in *dcp1Δdcp2Δ* yeast. PCs of Dcp2C (n=20), and Dcp2C Δ5H (n=14), and mean values (red bold horizontal bars)  $\pm$  SEM.

(D) Western blot of Dcp2 300 ΔH1, Dcp2C Δ5H and Dcp2 ΔH1 Δ5H in *dcp1Δdcp2Δ* strain shows that they expressed at similar levels.
