# Supplementary material for: A quantitative inventory of yeast P body proteins reveals principles of composition and specificity
Source: eLife journal article supplement (doi:10.7554/elife.56525), 2020-06-19
Supplement: supp [file elife-56525-supp-v1.zip › elife_poa_e56525_Figure_6_figure_supplement_1.pdf]

## Figure 6 - figure supplement 1

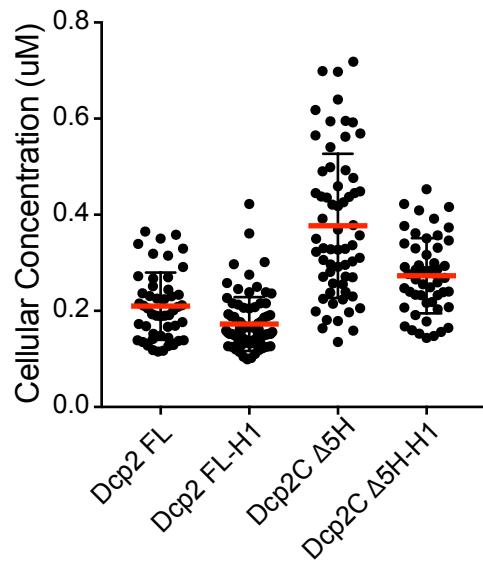

### Figure 6 – figure supplement 1

Average cellular concentrations of Dcp2 FL, Dcp2 FL-H1, Dcp2C Δ5H, and Dcp2C Δ5H-H1 in *dcp1Δdcp2Δ* strain expressing Edc3-mCherry, and mean values (red horizontal bars)  $\pm$  SEM.
