# Supplementary material for: A quantitative inventory of yeast P body proteins reveals principles of composition and specificity
Source: eLife journal article supplement (doi:10.7554/elife.56525), 2020-06-19
Supplement: supp [file elife-56525-supp-v1.zip › elife_poa_e56525_Figure_7_figure_supplement_1.pdf]

## Figure 7 - figure supplement 1

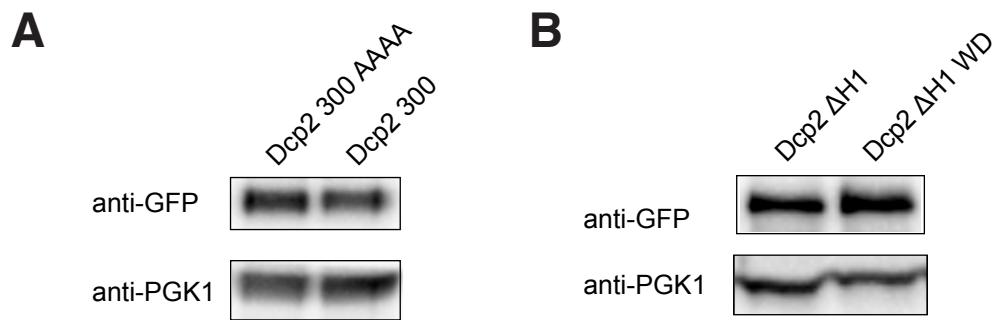

### Figure 7 – figure supplement 1

(A) Western blot of Dcp2 300 and Dcp2 300 AAAA in *dcp1 $\Delta$ dcp2 $\Delta$*  strain shows that they expressed at similar levels.

(B) Western blot of Dcp2  $\Delta$ H1 and Dcp2  $\Delta$ H1 WD in *dcp2 $\Delta$*  strain shows that they expressed at similar levels.
