# Supplementary material for: A quantitative inventory of yeast P body proteins reveals principles of composition and specificity
Source: eLife journal article supplement (doi:10.7554/elife.56525), 2020-06-19
Supplement: supp [file elife-56525-supp-v1.zip › elife_poa_e56525_Supplementary_file_3.xlsx]

## Sheet: Sheet1
Table 3. Protein-Protein and Protein-RNA interactions among regular P body proteins
	Protein-protein interactions	Protein-RNA interactions	Total interactions	Core or less concentrated protein in this study	Effect on P bodies when deleted	References
Dcp2	Edc3 + Pat1(10 in total), Dhh1, Edc1	1	13	Core	Increased number when deleted alone, but smaller size than dcp1∆. Smaller size in dcp1∆dcp2∆	Harigaya et al., 2010, Decker et al., 2007; Nissan et al., 2010, Dunckley et al., 2001, Charenton et al., 2017, Teixeira et al., 2007
Edc3	Dcp2, Edc3, Dhh1, Upf1, Pat1	>=1	>=6	Core	Decreased number	Harigaya et al., 2010, Decker et al., 2007, Swisher et al., 2011, Pilkington and Parker, 2008
Pat1	Pat1, Dcp2/Xrn1 (same site), Dhh1, Edc3, Lsm1-7, Upf1	1	8	Core	Smaller size	Nissan et al., 2010, Swisher et al., 2011, Pilkington and Parker, 2008, Sheth et al., 2003, Teixeira et al., 2007
Xrn1	Pat1	1	2	Core	Increased number	Nissan et al., 2010, Sheth et al., 2003
Lsm1-7	Pat1, Lsm4 Q/N domain (>=1)	1+1	4	Core	Decreased number when edc3∆	Decker et al., 2007, Sharif and Conti, 2013; Decker et al., 2007
Upf1	Pat1, Edc3, Upf2	1	4	Core	No effect	Swisher et al., 2011, Sheth et al., 2006
Dhh1	Pat1/Edc3 (same site), Dcp2, (Pop2), (Eap1)	>=1	5	Core	No effect	Nissan et al., 2010, Decker et al., 2007, Blewett and Goldstrohm, 2012, Coller et al., 2001, Rao and Parker, 2017
Pop2	CCR4, (Dhh1)	1?	3	non-core	n.d.	Coller et al., 2001, Basquin et al., 2012, Sheth et al 2003, Teixeira et al 2007
CCR4	Pop2	1?	2	non-core	No effect	Basquin et al., 2012, Teixeira et al., 2007
Not2		1	1	non-core	n.d.	Bhaskar et al., 2013, Sheth et al 2003, Teixeira et al 2007
Upf3	Upf2	1	2	non-core	Increased number	He et al., 1997, Sheth et al., 2006
Upf2	Upf1, Upf3	1	3	non-core	Increased number	Swisher et al., 2011, Sheth et al., 2006
Hek2		>=1	>=1	non-core	n.d.	Irie et al., 2002, Mitchell et al., 2003
Sbp1		>=1	>=1	non-core	Smaller size in sbp1∆ when grow to higher OD	Mitchell et al., 2013, Segal et al., 2006
Edc1	Dcp2	1	2	non-core	n.d.	Schwartz et al., 2003, Neef et al., 2009, Mugridge et al., 2018
Bre5	Bre5	1	2	non-core	n.d.	Li et al., 2005, Mitchell et al., 2013
Psp2		1	1	non-core	n.d.	Mitchell et al., 2013, Rao and Parker, 2017
Eap1	(Dhh1)	1	2	non-core	n.d.	Blewett and Goldstrohm., 2012, Mitchell et al., 2013
Ssd1		1	1	non-core	n.d.	Uesono et al., 1997, Kurischko et al., 2013
Additional P proteins found in WT strain
Dcp1	Dcp2, Edc1	1	3		Increased number when deleted alone, Smaller size in dcp1∆dcp2∆	Dunckley and Parker, 1999, Borja et al., 2011,
Pby1	(Dcp1), (Edc3)	0	2		n.d.	Krogan et al., 2006,
1) Did not consider high-throughput studies
2) Unclear if interactions between Pat1 and Upf1 is direct. Demonstrated by two-hybrid assays.
3) Lsm4 valency is unclear
4) Interactions between Dhh1 and Pop2, Dhh1 and Eap1 were demonstrated by Co-IP, unclear if the interactions are direct.
5) Hek2 has 3 RNA binding KH domains, but whether all of them interact with RNA is unclear
6) Sbp1 has 2 RRM domains, not sure if they all interact with RNA.
7) For Edc1, in dcp1∆ strain, total number of interactions is 3 since Dcp1 is lacking.
8) Pby1 interacts with Dcp1 and Edc3 based on current dara, but it is unclear if the interactions are direct

## Sheet: Sheet2
Supplementary File 3. Protein-Protein and Protein-RNA interactions among P body proteins
	Protein-protein interactions	Protein-RNA interactions	Total types of interacting molecules	Total interactions	Highly concentrated (HC) or less concentrated (LC) protein in this study	Effect on P bodies when deleted	References
Dcp2	Edc3 + Pat1(10 in total), Dhh1, Edc1, Dcp1	1	6	14	HC	Increased number when deleted alone, but smaller size than dcp1∆. Smaller size in dcp1∆dcp2∆	Harigaya et al., 2010, Decker et al., 2007; Nissan et al., 2010; Dunckley et al., 2001; Charenton et al., 2017; Teixeira et al., 2007
Edc3	Dcp2, Edc3, Dhh1, Upf1, Pat1,Pby1, Scd6	>=1	8	>=8	HC	Decreased number	Harigaya et al., 2010, Decker et al., 2007, Swisher et al., 2011; Pilkington and Parker, 2008
Pat1	Pat1, Dcp2/Xrn1 (same site), Dhh1, Edc3, Lsm1-7, Upf1, Dcp1	1	9	8	HC	Smaller size	Nissan et al., 2010, Swisher et al., 2011; Pilkington and Parker, 2008; Sheth et al., 2003; Teixeira et al., 2007
Xrn1	Pat1, Dcs1	1	3	3	HC	Increased number	Nissan et al., 2010, Sheth et al., 2003
Lsm1-7	Pat1, Lsm4 Q/N domain (>=1)	1+1	3	4	HC	Decreased number when edc3∆	Decker et al., 2007, Sharif and Conti, 2013; Decker et al., 2007
Upf1	Pat1, Edc3, Upf2, Sup45	1	5	5	HC	No effect	Swisher et al., 2011, Sheth et al., 2006
Dhh1	Pat1/Edc3 (same site), Dcp2, (Pop2), (Eap1)	>=1	6	5	HC	No effect	Nissan et al., 2010, Decker et al., 2007; Blewett and Goldstrohm, 2012; Coller et al., 2001; Rao and Parker, 2017
Pop2	CCR4, (Dhh1)	1	3	3	LC	n.d.	Coller et al., 2001, Basquin et al., 2012;; Sheth et al 2003, Teixeira et al 2007
CCR4	Pop2	1	2	2	LC	No effect	Basquin et al., 2012, Teixeira et al., 2007
Not2	Not5	1	2	2	LC	n.d.	Bhaskar et al., 2013, Sheth et al 2003, Teixeira et al 2007
Upf3	Upf2	1	2	2	LC	Increased number	He et al., 1997, Sheth et al., 2006
Upf2	Upf1, Upf3	1	3	3	LC	Increased number	Swisher et al., 2011, Sheth et al., 2006
Hek2		>=1	1	>=1	LC	n.d.	Irie et al., 2002, Mitchell et al., 2003
Sbp1		>=1	1	>=1	LC	Smaller size in sbp1∆ when grow to higher OD	Mitchell et al., 2013, Segal et al., 2006
Edc1	Dcp2, Dcp1	1	3	3	LC	n.d.	Schwartz et al., 2003, Neef et al., 2009, Borja
Bre5	Bre5	1	2	2	LC	n.d.	Li et al., 2005, Mitchell et al., 2013
Psp2		1	1	1	LC	n.d.	Mitchell et al., 2013, Rao and Parker, 2017
Eap1	(Dhh1), (Smy2)	1	3	3	LC	n.d.	Blewett and Goldstrohm., 2012, Mitchell et al., 2013
Ssd1		1	1	1	LC	n.d.	Uesono et al., 1997, Kurischko et al., 2013
Scd6	Edc3, Dhh1		2	2	LC	n.d.	Nissan et al., 2008
Not5	Not2	1	2	2	LC	n.d.	Bhaskar et al., 2013, Sheth et al 2003, Teixeira et al 2007
Bfr1		1	1	1	LC	increased number	Mitchell et al., 2013, Weidner et al., 2014
Scp160		1	1	1	LC	increased number	Weidner et al., 2014
Dcs1	Xrn1, Dcs2, Dcs1	1	4	4	LC	n.d.	Sinture et al., 2012, Malys et al, 2006
Dcs2	Dcs1	1	2	2	LC	n.d.	Malys et al., 2006
Edc2		1	1	1	LC	n.d.	Schwartz et al., 2003
Rpb4	Rpb7	1	2	2	LC	increased number	Lotan et al., 2005, Armache et al., 2003
Rpb7	Rpb4	1	2	2	LC	same number of P bodies after heat stress, while in WT cells, number of P bodies decreased.	Armache et al., 2003, Lotan et al., 2007
Sup45	Upf1	1	2	2	LC	n.d.	Czaplinski et al., 1998
Smy2	(Eap1)		1	(1)	LC	n.d.	Kofler et al., 2005
Tis11		1	1	1	LC	n.d.	Puig et al., 2005
Additional P proteins found in WT strain
Dcp1	Dcp2, Edc1, Pat1	1	4	4		Increased number when deleted alone, Smaller size in dcp1∆dcp2∆	Dunckley and Parker, 1999, Borja et al., 2011,
Pby1	(Dcp1), (Edc3)	0	2	2		n.d.	Krogan et al., 2006,
1) Did not consider high-throughput studies
2) Unclear if interactions between Pat1 and Upf1 is direct. Demonstrated by two-hybrid assays.
3) Lsm4 valency is unclear
4) Interactions between Dhh1 and Pop2, Dhh1 and Eap1, and Eap1 and Smy2 were demonstrated by Co-IP, unclear if the interactions are direct.
5) Hek2 has 3 RNA binding KH domains, but whether all of them interact with RNA is unclear
6) Sbp1 has 2 RRM domains, not sure if they all interact with RNA.
7) For Edc1, in dcp1∆ strain, total number of interactions is 3 since Dcp1 is lacking.
8) Pby1 interacts with Dcp1 and Edc3 based on current dara, but it is unclear if the interactions are direct
