# Supplementary material for: A quantitative inventory of yeast P body proteins reveals principles of composition and specificity
Source: eLife journal article supplement (doi:10.7554/elife.56525), 2020-06-19
Supplement: supp [file elife-56525-supp-v1.zip › elife_poa_e56525_Supplementary_file_4.xlsx]

## Sheet: plasmid used in the study
Supplementary File 4. Plasmids used in this study
Plasmid name	description	makers	N-terminal tag	C-terminal tag	Notes
Dcp2 FL	carrying the DCP2 promoter, a sequence encoding full length Dcp2 (1-970) - GFP and the ADH1 terminator	amp+, -URA		GFP
Dcp2 ∆N	carrying the DCP2 promoter, a sequence encoding Dcp2 (243-970) - GFP and the ADH1 terminator	amp+, -URA		GFP
Dcp2 ∆H1	carrying the DCP2 promoter, a sequence encoding Dcp2 (1-970) L255A - GFP and the ADH1 terminator	amp+, -URA		GFP
Dcp2 300	carrying the DCP2 promoter, a sequence encoding Dcp2 (1-300) - GFP and the ADH1 terminator	amp+, -URA		GFP
Dcp2 300 ∆H1	carrying the DCP2 promoter, a sequence encoding Dcp2 (1-300) L255A - GFP and the ADH1 terminator	amp+, -URA		GFP
Dcp2 300 AAAA	carrying the DCP2 promoter, a sequence encoding Dcp2 (1-300) R170A K212A K216A R229A - GFP and the ADH1 terminator	amp+, -URA		GFP
Dcp2 ∆H1 WD	carrying the DCP2 promoter, a sequence encoding Dcp2 (1-970) L255A W50A D54A- GFP and the ADH1 terminator	amp+, -URA		GFP
Dcp2C ∆5H	carrying the DCP2 promoter, a sequence encoding Dcp2 (327-970) X440-450A X489-500A, X701-708A, X827-831A, X935-938A - GFP and the ADH1 terminator	amp+, -URA		GFP	five Edc3 binding regions 440-450, 489-500, 701-708, 827-831, 935-938 were mutated to alanine
Dcp2 ∆H1 ∆5H	carrying the DCP2 promoter, a sequence encoding Dcp2 (1-970) L255A X440-450A X489-500A, X701-708A, X827-831A, X935-938A - GFP and the ADH1 terminator	amp+, -URA		GFP	five Edc3 binding regions 440-450, 489-500, 701-708, 827-831, 935-938 were mutated to alanine
Dcp2 FL-H1	carrying the DCP2 promoter, a sequence encoding full length Dcp2 with Dcp2 amino acids 242-265 added after aa970 - GFP and the ADH1 terminator	amp+, -URA		GFP
Dcp2C ∆5H-H1	carrying the DCP2 promoter, a sequence encoding Dcp2C ∆5H with Dcp2 amino acids 242-265 added after aa970- GFP and the ADH1 terminator	amp+, -URA		GFP
N-Dcp2	carrying the DCP2 promoter, a sequence encoding GFP - Dcp2 (1-970) and the ADH1 terminator	amp+, -URA	GFP
Edc3	carrying the EDC3 promoter, a sequence encoding Edc3-mCherry and the EDC3 terminator	amp+, -LYS		mCherry
Edc3	carrying the EDC3 promoter, a sequence encoding Edc3-mCherry and the EDC3 terminator	amp+, -TRP		mCherry
