# Supplementary material for: A quantitative inventory of yeast P body proteins reveals principles of composition and specificity
Source: eLife journal article supplement (doi:10.7554/elife.56525), 2020-06-19
Supplement: supp [file elife_poa_e56525_Supplementary_file_1.xlsx]

## Sheet: Sheet1
		Supplementary File 1. Yeast strains used in this study
Yeast Strains	note	genotype	P body localization	Explanation for lacking of P body localization in dcp1∆ strain	Reference for strain	Reference for localization to P bodies
yRP3156	dcp1∆ dcp2∆	Mat a his4-539 leu2-3,112 lys2-201 trp1 ura3-52 dcp1::URA3(5FOA+) dcp2::TRP1 cup1::LEU2/PGK1pG/MFA2pG			this study
yRP1346	dcp2∆	Mat a his4-539 leu2-3,112 lys2-201 trp1 ura3-52 dcp2::TRP1 cup1::LEU2/PGK1pG/MFA2pG			Dunckley and Parker 1999
yRP1936	dcp1∆ Dcp2	Mat a leu2-3,112 cup1::LEU2/PGK1pG/MFA2pG his4-539 trp1 ura3-52 DCP2-GFP(NEO) dcp1::URA3	Y		Brengues et al 2005	Sheth and Parker 2003
yRP2254	dcp1∆ Edc3	Mat a leu2-3,112 trp1 ura3-52 his4-539 lys2-201 cup1::LEU2/PGK1pG/MFA2pG dcp1::URA3 EDC3-GFP (NEO)	Y		Teixeira et al 2007	Kshirsagar et al 2004
yRP2237	dcp1∆ Pat1	Mat a leu2-3,112 trp1 ura3-52 his4-539 cup1::LEU2/PGK1pG/MFA2pG dcp1::URA3 PAT1-GFP (NEO)	Y		Teixeira et al 2007	Sheth and Parker 2003
yRP2246	dcp1∆ Xrn1	Mat a leu2-3,112 trp1 ura3-52 his4-539 cup1::LEU2/PGK1pG/MFA2pG dcp1::URA3 XRN1-GFP (NEO)	Y		Teixeira et al 2007	Sheth and Parker 2003
yRP2230	dcp1∆ Lsm1	Mat a leu2-3,112 trp1 ura3-52 his4-539 cup1::LEU2/PGK1pG/MFA2pG dcp1::URA3 LSM1-GFP (NEO)	Y		Teixeira et al 2007	Sheth and Parker 2003
yRP1840	dcp1∆ Upf1	Mat a leu2-3,112 trp1 ura3-52 his4-539 cup1::LEU2/PGK1pG/MFA2pG dcp1::URA3 UPF1-GFP (NEO)	Y		Sheth and Parker 2006	Sheth and Parker 2006
yRP1736	dcp1∆ Dhh1	Mat a leu2-3,112 trp1 ura3-52 his4-539 cup1::LEU2/PGK1pG/MFA2pG dcp1::URA3 DHH1-GFP (NEO)	Y		Sheth and Parker 2003	Sheth and Parker 2003
yRP2269	dcp1∆ Pop2	Mat a leu2-3,112 trp1 ura3-52 his4-539 cup1::LEU2/PGK1pG/MFA2pG dcp1::URA3 POP2-GFP (NEO)	Y		Teixeira et al 2007	Sheth and Parker 2003, Teixeira et al 2007
yRP1844	dcp1∆ Upf3	Mat a leu2-3.112 ura3-52 cup1::LEU2/PGK1pG/MFA2pG, dcp1::URA3, UPF3-GFP (NEO)	Y		Sheth and Parker 2006	Sheth and Parker 2006
yRP1916	dcp1∆ Not2	Mat alpha leu2-3,112 cup1::LEU2/PGK1pG/MFA2pG trp1 his4-539 ura3-52 dcp1::URA3 NOT2-GFP(NEO)	Y		Muhlrad and Parker 2005	Sheth and Parker 2003, Teixeira et al 2007
yRP1842	dcp1∆ Upf2	Mat a leu2-3,112, ura3-52 cup1::LEU2/PGK1pG/MFA2pG, dcp1:: URA3, UPF2-GFP(NEO)	Y		Sheth and Parker 2006	Sheth and Parker 2006
yRP2261	dcp1∆ CCR4	Mat a leu2-3,112 trp1 ura3-52 his4-539 cup1::LEU2/PGK1pG/MFA2pG dcp1::URA3 CCR4-GFP (NEO)	Y		Teixeira et al 2007	Sheth and Parker 2003, Teixeira et al 2007
yRP3140	dcp1∆ Hek2	Mat a leu2, ura3, his3, met15, dcp1::URA3 HEK2::GFP(HIS3MX6)	Y		this study	Mitchell et al 2013
yRP3137	dcp1∆ Sbp1	Mat alpha leu2, ura3, his3, met15, dcp1::URA3 SBP1::GFP(HIS3MX6)	Y		this study	Mitchell et al 2013
yRP3154	dcp1∆ Edc1	Mat a leu2, ura3, his3, met15, dcp1::URA3 EDC1::GFP(HIS3MX6)	Y		this study	Neef et al 2009
yRP3143	dcp1∆ Bre5	Mat a leu2, ura3, his3, met15, dcp1::URA3 BRE5::GFP(HIS3MX6)	Y		this study	Mitchell et al 2013
yRP3136	dcp1∆ Psp2	Mat a leu2, ura3, his3, met15, dcp1::URA3 PSP2::GFP(HIS3MX6)	Y		this study	Mitchell et al 2013
yRP3146	dcp1∆ Eap1	Mat a leu2, ura3, his3, met15, dcp1::URA3 EAP1::GFP(HIS3MX6)	Y		this study	Mitchell et al 2013
yRP3149	dcp1∆ Ssd1	Mat a leu2, ura3, his3, met15, dcp1::URA3 SSD1::GFP(HIS3MX6)	Y		this study	Kurischko et al 2011
yRP1919	dcp1∆ Not5	Mat alpha trp1 leu2-3, 112 cup1::LEU2/PGK1pG/MFA2pG ura3-52 dcp1::URA3 NOT5-GFP(NEO)	N		Muhlrad and Parker 2005	Sheth and Parker 2003, Teixeira et al 2007
yRP3083	dcp1∆ Scd6	Mat alpha leu2, ura3, his3, met15, dcp1::URA3 SCD6::GFP(HIS3MX6)	N	Compete binding sites on Dcp2 with Edc3. Because Edc3 is highly concentrated, Scd6 partitioning can be very poor.	this study	Rajyaguru et al 2012
yRP3142	dcp1∆ Brf1	Mat alpha leu2, ura3, his3, met15, dcp1::URA3 BFR1::GFP(HIS3MX6)	N	Reported to localize to P bodies after 50min -glucose. Might be stress specific	this study	Simpson et al 2014
yRP3144	dcp1∆ Dcs1	Mat alpha leu2, ura3, his3, met15, dcp1::URA3 DCS1::GFP(HIS3MX6)	N	P body localization is not shown by microscope	this study	Malys et al 2006
yRP3145	dcp1∆ Dcs2	Mat alpha leu2, ura3, his3, met15, dcp1::URA3 DCS2::GFP(HIS3MX6)	N	Dcs2 is reported to locate in P bodies as cells progressed into diauxie. We only analyzed log-phase cells.	this study	Malys et al 2006
yRP3139	dcp1∆ Edc2	Mat alpha leu2, ura3, his3, met15, dcp1::URA3 EDC2::GFP(HIS3MX6)	N	A subset of it is reported to localize to P bodies under glucose starvation or del_Xrn1 strains. Maybe stress specific.	this study	Neef et al 2009
yRP3141	dcp1∆ Rbp4	Mat alpha leu2, ura3, his3, met15, dcp1::URA3 RBP4::GFP(HIS3MX6)	N	P body localization increased after 4h starvation (lacking both glucose and amino acid) and increased more after 24 stravation. May be stress specific.	this study	Lotan et al 2005
yRP3153	dcp1∆ Rbp7	Mat alpha leu2, ura3, his3, met15, dcp1::URA3 RBP7::GFP(HIS3MX6)	N	Rpb7 co-localizes with Dcp2 after long starvation. May be stress specific	this study	Lotan et al 2007
yRP3150	dcp1∆ Sup45	Mat a ura3 his3 leu2 met15 dcp1∆::URA3 SUP45::GFP(HIS3MX6)	N		this study	Buchan et al 2008
yRP3148	dcp1∆ Smy2	Mat a leu2, ura3, his3, met15, dcp1::URA3 SMY2::GFP(HIS3MX6)	N	Localization of P body was found using transfected plasmid. May be partition into P bodies when overexpressed.	this study	Georgiev et al 2007
yRP3147	dcp1∆ Tis11	Mat a leu2, ura3, his3, met15, dcp1::URA3 TIS11::GFP(HIS3MX6)	N	Binds to 3'UTR of specific mRNAs and partition into P bodies when expressing on plasmid. May be overexpressed, or the specific mRNAs are not in P bodies under our experimental conditions.	this study	Pedro-Segura et al 2008
yRP3138	dcp1∆ Pby1	Mat a leu2, ura3, his3, met15, dcp1::URA3 PBY1::GFP(HIS3MX6)	N	Pby1 is reported to interact with Dcp1. Lacking the factor recruiting Pby1 into P bodies in dcp1∆ strain.	this study	Sweet et al 2007
RESGEN	WT Dcp2	MATa his3∆ leu2∆ met15∆ ura3∆ DCP2::GFP(HIS3MX6)	Y		Huh et al., 2003	Sheth and Parker 2003
RESGEN	WT Edc3	MATa his3∆ leu2∆ met15∆ ura3∆ EDC3::GFP(HIS3MX6)	Y		Huh et al., 2003	Kshirsagar et al 2004
RESGEN	WT Pat1	MATa his3∆ leu2∆ met15∆ ura3∆ PAT1::GFP(HIS3MX6)	Y		Huh et al., 2003	Sheth and Parker 2003
RESGEN	WT Xrn1	MATa his3∆ leu2∆ met15∆ ura3∆ XRN1::GFP(HIS3MX6)	Y		Huh et al., 2003	Sheth and Parker 2003
RESGEN	WT Lsm1	MATa his3∆ leu2∆ met15∆ ura3∆ LSM1::GFP(HIS3MX6)	Y		Huh et al., 2003	Sheth and Parker 2003
RESGEN	WT Upf1	MATa his3∆ leu2∆ met15∆ ura3∆ UPF1::GFP(HIS3MX6)	Y		Huh et al., 2003	Sheth and Parker 2006
RESGEN	WT Dhh1	MATa his3∆ leu2∆ met15∆ ura3∆ DHH1::GFP(HIS3MX6)	Y		Huh et al., 2003	Sheth and Parker 2003
RESGEN	WT Pop2	MATa his3∆ leu2∆ met15∆ ura3∆ POP2::GFP(HIS3MX6)	N		Huh et al., 2003	Sheth and Parker 2003, Teixeira et al 2007
RESGEN	WT Upf3	MATa his3∆ leu2∆ met15∆ ura3∆ UPF1::GFP(HIS3MX6)	N		Huh et al., 2003	Sheth and Parker 2006
RESGEN	WT Not2	MATa his3∆ leu2∆ met15∆ ura3∆ NOT2::GFP(HIS3MX6)	N		Huh et al., 2003	Sheth and Parker 2003, Teixeira et al 2007
RESGEN	WT Upf2	MATa his3∆ leu2∆ met15∆ ura3∆ UPF2::GFP(HIS3MX6)	N		Huh et al., 2003	Sheth and Parker 2006
RESGEN	WT CCR4	MATa his3∆ leu2∆ met15∆ ura3∆ CCR4::GFP(HIS3MX6)	N		Huh et al., 2003	Sheth and Parker 2003, Teixeira et al 2007
RESGEN	WT Hek2	MATa his3∆ leu2∆ met15∆ ura3∆ HEK2::GFP(HIS3MX6)	Y		Huh et al., 2003	Mitchell et al 2013
RESGEN	WT Sbp1	MATa his3∆ leu2∆ met15∆ ura3∆ SBP1::GFP(HIS3MX6)	Y		Huh et al., 2003	Mitchell et al 2013
RESGEN	WT Edc1	MATa his3∆ leu2∆ met15∆ ura3∆ EDC1::GFP(HIS3MX6)	N		Huh et al., 2003	Neef et al 2009
RESGEN	WT Bre5	MATa his3∆ leu2∆ met15∆ ura3∆ BRE5::GFP(HIS3MX6)	N		Huh et al., 2003	Mitchell et al 2013
RESGEN	WT Psp2	MATa his3∆ leu2∆ met15∆ ura3∆ PSP2::GFP(HIS3MX6)	N		Huh et al., 2003	Mitchell et al 2013
RESGEN	WT Eap1	MATa his3∆ leu2∆ met15∆ ura3∆ EAP1::GFP(HIS3MX6)	N		Huh et al., 2003	Buchan et al 2008
RESGEN	WT Ssd1	MATa his3∆ leu2∆ met15∆ ura3∆ SSD1::GFP(HIS3MX6)	N		Huh et al., 2003	Kurischko et al 2011
RESGEN	WT Not5	MATa his3∆ leu2∆ met15∆ ura3∆ NOT5::GFP(HIS3MX6)	N		Huh et al., 2003	Sheth and Parker 2003, Teixeira et al 2007
RESGEN	WT Scd6	MATa his3∆ leu2∆ met15∆ ura3∆ SCD6::GFP(HIS3MX6)	N		Huh et al., 2003	Rajyaguru et al 2012
RESGEN	WT Brf1	MATa his3∆ leu2∆ met15∆ ura3∆ BRF1::GFP(HIS3MX6)	N		Huh et al., 2003	Simpson et al 2014
RESGEN	WT Dcs1	MATa his3∆ leu2∆ met15∆ ura3∆ DCS1::GFP(HIS3MX6)	N		Huh et al., 2003	Malys et al 2006
RESGEN	WT Dcs2	MATa his3∆ leu2∆ met15∆ ura3∆ DCS2::GFP(HIS3MX6)	N		Huh et al., 2003	Malys et al 2006
RESGEN	WT Edc2	MATa his3∆ leu2∆ met15∆ ura3∆ EDC2::GFP(HIS3MX6)	N		Huh et al., 2003	Neef et al 2009
RESGEN	WT Rbp4	MATa his3∆ leu2∆ met15∆ ura3∆ RPB4::GFP(HIS3MX6)	N		Huh et al., 2003	Lotan et al 2005
RESGEN	WT Rbp7	MATa his3∆ leu2∆ met15∆ ura3∆ RBP7::GFP(HIS3MX6)	N		Huh et al., 2003	Lotan et al 2007
RESGEN	WT Sup45	MATa his3∆ leu2∆ met15∆ ura3∆ RBP7::GFP(HIS3MX6)	N		Huh et al., 2003	Buchan et al 2008
RESGEN	WT Smy2	MATa his3∆ leu2∆ met15∆ ura3∆ SMY2::GFP(HIS3MX6)	N		Huh et al., 2003	Georgiev et al 2007
RESGEN	WT Tis11	MATa his3∆ leu2∆ met15∆ ura3∆ TIS11::GFP(HIS3MX6)	N		Huh et al., 2003	Pedro-Segura et al 2008
RESGEN	WT Pby1	MATa his3∆ leu2∆ met15∆ ura3∆ PBY1::GFP(HIS3MX6)	Y		Huh et al., 2003	Sweet et al 2007
RESGEN	WT Dcp1	MATa his3∆ leu2∆ met15∆ ura3∆ DCP1::GFP(HIS3MX6)	Y		Huh et al., 2003	Sheth and Parker 2003
yRP3239	dcp1∆ Dcp2-mCherry, Edc3-GFP	MAT alpha lys2 leu2-3,112 trp1 ura3-52 his4-539 cup1::LEU2/PGK1pG/MFA2pG dcp1::URA3 DCP2mCH:HYGB EDC3GFPNEO	Y		this study
yRP3238	dcp1∆ Dcp2-mCherry, Pat1-GFP	MAT alpha lys2 leu2-3,112 trp1 ura3-52 his4-539 cup1::LEU2/PGK1pG/MFA2pG dcp1::URA3 DCP2mCH:HYGB PAT1GFPNEO	Y		this study
yRP3240	dcp1∆ Dcp2-mCherry, Xrn1-GFP	MAT alpha lys2 leu2-3,112 trp1 ura3-52 his4-539 cup1::LEU2/PGK1pG/MFA2pG dcp1::URA3 DCP2mCH:HYGB XRN1GFPNEO	Y		this study
