# Supplementary material for: A quantitative inventory of yeast P body proteins reveals principles of composition and specificity
Source: eLife. 2020 Jun 19;9:e56525. doi: 10.7554/eLife.56525 (PMC7373430; doi:10.7554/eLife.56525)
Supplement: Supplementary file 1. [file elife-56525-supp1.xlsx]

## Sheet: Sheet1
		Supplementary File 1. Yeast strains used in this study
Yeast Strains	note	genotype	P body localization	Explanation for lacking of P body localization in dcp1∆ strain	Reference for strain	Reference for localization to P bodies
yRP3156	dcp1∆ dcp2∆	Mat a his4-539 leu2-3,112 lys2-201 trp1 ura3-52 dcp1::URA3(5FOA+) dcp2::TRP1 cup1::LEU2/PGK1pG/MFA2pG			this study
yRP1346	dcp2∆	Mat a his4-539 leu2-3,112 lys2-201 trp1 ura3-52 dcp2::TRP1 cup1::LEU2/PGK1pG/MFA2pG			Dunckley and Parker 1999
yRP1936	dcp1∆ Dcp2	Mat a leu2-3,112 cup1::LEU2/PGK1pG/MFA2pG his4-539 trp1 ura3-52 DCP2-GFP(NEO) dcp1::URA3	Y		Brengues et al 2005	Sheth and Parker 2003
yRP2254	dcp1∆ Edc3	Mat a leu2-3,112 trp1 ura3-52 his4-539 lys2-201 cup1::LEU2/PGK1pG/MFA2pG dcp1::URA3 EDC3-GFP (NEO)	Y		Teixeira et al 2007	Kshirsagar et al 2004
yRP2237	dcp1∆ Pat1	Mat a leu2-3,112 trp1 ura3-52 his4-539 cup1::LEU2/PGK1pG/MFA2pG dcp1::URA3 PAT1-GFP (NEO)	Y		Teixeira et al 2007	Sheth and Parker 2003
yRP2246	dcp1∆ Xrn1	Mat a leu2-3,112 trp1 ura3-52 his4-539 cup1::LEU2/PGK1pG/MFA2pG dcp1::URA3 XRN1-GFP (NEO)	Y		Teixeira et al 2007	Sheth and Parker 2003
yRP2230	dcp1∆ Lsm1	Mat a leu2-3,112 trp1 ura3-52 his4-539 cup1::LEU2/PGK1pG/MFA2pG dcp1::URA3 LSM1-GFP (NEO)	Y		Teixeira et al 2007	Sheth and Parker 2003
yRP1840	dcp1∆ Upf1	Mat a leu2-3,112 trp1 ura3-52 his4-539 cup1::LEU2/PGK1pG/MFA2pG dcp1::URA3 UPF1-GFP (NEO)	Y		Sheth and Parker 2006	Sheth and Parker 2006
yRP1736	dcp1∆ Dhh1	Mat a leu2-3,112 trp1 ura3-52 his4-539 cup1::LEU2/PGK1pG/MFA2pG dcp1::URA3 DHH1-GFP (NEO)	Y		Sheth and Parker 2003	Sheth and Parker 2003
yRP2269	dcp1∆ Pop2	Mat a leu2-3,112 trp1 ura3-52 his4-539 cup1::LEU2/PGK1pG/MFA2pG dcp1::URA3 POP2-GFP (NEO)	Y		Teixeira et al 2007	Sheth and Parker 2003, Teixeira et al 2007
yRP1844	dcp1∆ Upf3	Mat a leu2-3.112 ura3-52 cup1::LEU2/PGK1pG/MFA2pG, dcp1::URA3, UPF3-GFP (NEO)	Y		Sheth and Parker 2006	Sheth and Parker 2006
yRP1916	dcp1∆ Not2	Mat alpha leu2-3,112 cup1::LEU2/PGK1pG/MFA2pG trp1 his4-539 ura3-52 dcp1::URA3 NOT2-GFP(NEO)	Y		Muhlrad and Parker 2005	Sheth and Parker 2003, Teixeira et al 2007
yRP1842	dcp1∆ Upf2	Mat a leu2-3,112, ura3-52 cup1::LEU2/PGK1pG/MFA2pG, dcp1:: URA3, UPF2-GFP(NEO)	Y		Sheth and Parker 2006	Sheth and Parker 2006
yRP2261	dcp1∆ CCR4	Mat a leu2-3,112 trp1 ura3-52 his4-539 cup1::LEU2/PGK1pG/MFA2pG dcp1::URA3 CCR4-GFP (NEO)	Y		Teixeira et al 2007	Sheth and Parker 2003, Teixeira et al 2007
yRP3140	dcp1∆ Hek2	Mat a leu2, ura3, his3, met15, dcp1::URA3 HEK2::GFP(HIS3MX6)	Y		this study	Mitchell et al 2013
yRP3137	dcp1∆ Sbp1	Mat alpha leu2, ura3, his3, met15, dcp1::URA3 SBP1::GFP(HIS3MX6)	Y		this study	Mitchell et al 2013
yRP3154	dcp1∆ Edc1	Mat a leu2, ura3, his3, met15, dcp1::URA3 EDC1::GFP(HIS3MX6)	Y		this study	Neef et al 2009
yRP3143	dcp1∆ Bre5	Mat a leu2, ura3, his3, met15, dcp1::URA3 BRE5::GFP(HIS3MX6)	Y		this study	Mitchell et al 2013
yRP3136	dcp1∆ Psp2	Mat a leu2, ura3, his3, met15, dcp1::URA3 PSP2::GFP(HIS3MX6)	Y		this study	Mitchell et al 2013
yRP3146	dcp1∆ Eap1	Mat a leu2, ura3, his3, met15, dcp1::URA3 EAP1::GFP(HIS3MX6)	Y		this study	Mitchell et al 2013
yRP3149	dcp1∆ Ssd1	Mat a leu2, ura3, his3, met15, dcp1::URA3 SSD1::GFP(HIS3MX6)	Y		this study	Kurischko et al 2011
yRP1919	dcp1∆ Not5	Mat alpha trp1 leu2-3, 112 cup1::LEU2/PGK1pG/MFA2pG ura3-52 dcp1::URA3 NOT5-GFP(NEO)	N		Muhlrad and Parker 2005	Sheth and Parker 2003, Teixeira et al 2007
yRP3083	dcp1∆ Scd6	Mat alpha leu2, ura3, his3, met15, dcp1::URA3 SCD6::GFP(HIS3MX6)	N	Compete binding sites on Dcp2 with Edc3. Because Edc3 is highly concentrated, Scd6 partitioning can be very poor.	this study	Rajyaguru et al 2012
yRP3142	dcp1∆ Brf1	Mat alpha leu2, ura3, his3, met15, dcp1::URA3 BFR1::GFP(HIS3MX6)	N	Reported to localize to P bodies after 50min -glucose. Might be stress specific	this study	Simpson et al 2014
yRP3144	dcp1∆ Dcs1	Mat alpha leu2, ura3, his3, met15, dcp1::URA3 DCS1::GFP(HIS3MX6)	N	P body localization is not shown by microscope	this study	Malys et al 2006
yRP3145	dcp1∆ Dcs2	Mat alpha leu2, ura3, his3, met15, dcp1::URA3 DCS2::GFP(HIS3MX6)	N	Dcs2 is reported to locate in P bodies as cells progressed into diauxie. We only analyzed log-phase cells.	this study	Malys et al 2006
yRP3139	dcp1∆ Edc2	Mat alpha leu2, ura3, his3, met15, dcp1::URA3 EDC2::GFP(HIS3MX6)	N	A subset of it is reported to localize to P bodies under glucose starvation or del_Xrn1 strains. Maybe stress specific.	this study	Neef et al 2009
yRP3141	dcp1∆ Rbp4	Mat alpha leu2, ura3, his3, met15, dcp1::URA3 RBP4::GFP(HIS3MX6)	N	P body localization increased after 4h starvation (lacking both glucose and amino acid) and increased more after 24 stravation. May be stress specific.	this study	Lotan et al 2005
yRP3153	dcp1∆ Rbp7	Mat alpha leu2, ura3, his3, met15, dcp1::URA3 RBP7::GFP(HIS3MX6)	N	Rpb7 co-localizes with Dcp2 after long starvation. May be stress specific	this study	Lotan et al 2007
yRP3150	dcp1∆ Sup45	Mat a ura3 his3 leu2 met15 dcp1∆::URA3 SUP45::GFP(HIS3MX6)	N		this study	Buchan et al 2008
yRP3148	dcp1∆ Smy2	Mat a leu2, ura3, his3, met15, dcp1::URA3 SMY2::GFP(HIS3MX6)	N	Localization of P body was found using transfected plasmid. May be partition into P bodies when overexpressed.	this study	Georgiev et al 2007
yRP3147	dcp1∆ Tis11	Mat a leu2, ura3, his3, met15, dcp1::URA3 TIS11::GFP(HIS3MX6)	N	Binds to 3'UTR of specific mRNAs and partition into P bodies when expressing on plasmid. May be overexpressed, or the specific mRNAs are not in P bodies under our experimental conditions.	this study	Pedro-Segura et al 2008
yRP3138	dcp1∆ Pby1	Mat a leu2, ura3, his3, met15, dcp1::URA3 PBY1::GFP(HIS3MX6)	N	Pby1 is reported to interact with Dcp1. Lacking the factor recruiting Pby1 into P bodies in dcp1∆ strain.	this study	Sweet et al 2007
RESGEN	WT Dcp2	MATa his3∆ leu2∆ met15∆ ura3∆ DCP2::GFP(HIS3MX6)	Y		Huh et al., 2003	Sheth and Parker 2003
RESGEN	WT Edc3	MATa his3∆ leu2∆ met15∆ ura3∆ EDC3::GFP(HIS3MX6)	Y		Huh et al., 2003	Kshirsagar et al 2004
RESGEN	WT Pat1	MATa his3∆ leu2∆ met15∆ ura3∆ PAT1::GFP(HIS3MX6)	Y		Huh et al., 2003	Sheth and Parker 2003
RESGEN	WT Xrn1	MATa his3∆ leu2∆ met15∆ ura3∆ XRN1::GFP(HIS3MX6)	Y		Huh et al., 2003	Sheth and Parker 2003
RESGEN	WT Lsm1	MATa his3∆ leu2∆ met15∆ ura3∆ LSM1::GFP(HIS3MX6)	Y		Huh et al., 2003	Sheth and Parker 2003
RESGEN	WT Upf1	MATa his3∆ leu2∆ met15∆ ura3∆ UPF1::GFP(HIS3MX6)	Y		Huh et al., 2003	Sheth and Parker 2006
RESGEN	WT Dhh1	MATa his3∆ leu2∆ met15∆ ura3∆ DHH1::GFP(HIS3MX6)	Y		Huh et al., 2003	Sheth and Parker 2003
RESGEN	WT Pop2	MATa his3∆ leu2∆ met15∆ ura3∆ POP2::GFP(HIS3MX6)	N		Huh et al., 2003	Sheth and Parker 2003, Teixeira et al 2007
RESGEN	WT Upf3	MATa his3∆ leu2∆ met15∆ ura3∆ UPF1::GFP(HIS3MX6)	N		Huh et al., 2003	Sheth and Parker 2006
RESGEN	WT Not2	MATa his3∆ leu2∆ met15∆ ura3∆ NOT2::GFP(HIS3MX6)	N		Huh et al., 2003	Sheth and Parker 2003, Teixeira et al 2007
RESGEN	WT Upf2	MATa his3∆ leu2∆ met15∆ ura3∆ UPF2::GFP(HIS3MX6)	N		Huh et al., 2003	Sheth and Parker 2006
RESGEN	WT CCR4	MATa his3∆ leu2∆ met15∆ ura3∆ CCR4::GFP(HIS3MX6)	N		Huh et al., 2003	Sheth and Parker 2003, Teixeira et al 2007
RESGEN	WT Hek2	MATa his3∆ leu2∆ met15∆ ura3∆ HEK2::GFP(HIS3MX6)	Y		Huh et al., 2003	Mitchell et al 2013
RESGEN	WT Sbp1	MATa his3∆ leu2∆ met15∆ ura3∆ SBP1::GFP(HIS3MX6)	Y		Huh et al., 2003	Mitchell et al 2013
RESGEN	WT Edc1	MATa his3∆ leu2∆ met15∆ ura3∆ EDC1::GFP(HIS3MX6)	N		Huh et al., 2003	Neef et al 2009
RESGEN	WT Bre5	MATa his3∆ leu2∆ met15∆ ura3∆ BRE5::GFP(HIS3MX6)	N		Huh et al., 2003	Mitchell et al 2013
RESGEN	WT Psp2	MATa his3∆ leu2∆ met15∆ ura3∆ PSP2::GFP(HIS3MX6)	N		Huh et al., 2003	Mitchell et al 2013
RESGEN	WT Eap1	MATa his3∆ leu2∆ met15∆ ura3∆ EAP1::GFP(HIS3MX6)	N		Huh et al., 2003	Buchan et al 2008
RESGEN	WT Ssd1	MATa his3∆ leu2∆ met15∆ ura3∆ SSD1::GFP(HIS3MX6)	N		Huh et al., 2003	Kurischko et al 2011
RESGEN	WT Not5	MATa his3∆ leu2∆ met15∆ ura3∆ NOT5::GFP(HIS3MX6)	N		Huh et al., 2003	Sheth and Parker 2003, Teixeira et al 2007
RESGEN	WT Scd6	MATa his3∆ leu2∆ met15∆ ura3∆ SCD6::GFP(HIS3MX6)	N		Huh et al., 2003	Rajyaguru et al 2012
RESGEN	WT Brf1	MATa his3∆ leu2∆ met15∆ ura3∆ BRF1::GFP(HIS3MX6)	N		Huh et al., 2003	Simpson et al 2014
RESGEN	WT Dcs1	MATa his3∆ leu2∆ met15∆ ura3∆ DCS1::GFP(HIS3MX6)	N		Huh et al., 2003	Malys et al 2006
RESGEN	WT Dcs2	MATa his3∆ leu2∆ met15∆ ura3∆ DCS2::GFP(HIS3MX6)	N		Huh et al., 2003	Malys et al 2006
RESGEN	WT Edc2	MATa his3∆ leu2∆ met15∆ ura3∆ EDC2::GFP(HIS3MX6)	N		Huh et al., 2003	Neef et al 2009
RESGEN	WT Rbp4	MATa his3∆ leu2∆ met15∆ ura3∆ RPB4::GFP(HIS3MX6)	N		Huh et al., 2003	Lotan et al 2005
RESGEN	WT Rbp7	MATa his3∆ leu2∆ met15∆ ura3∆ RBP7::GFP(HIS3MX6)	N		Huh et al., 2003	Lotan et al 2007
RESGEN	WT Sup45	MATa his3∆ leu2∆ met15∆ ura3∆ RBP7::GFP(HIS3MX6)	N		Huh et al., 2003	Buchan et al 2008
RESGEN	WT Smy2	MATa his3∆ leu2∆ met15∆ ura3∆ SMY2::GFP(HIS3MX6)	N		Huh et al., 2003	Georgiev et al 2007
RESGEN	WT Tis11	MATa his3∆ leu2∆ met15∆ ura3∆ TIS11::GFP(HIS3MX6)	N		Huh et al., 2003	Pedro-Segura et al 2008
RESGEN	WT Pby1	MATa his3∆ leu2∆ met15∆ ura3∆ PBY1::GFP(HIS3MX6)	Y		Huh et al., 2003	Sweet et al 2007
RESGEN	WT Dcp1	MATa his3∆ leu2∆ met15∆ ura3∆ DCP1::GFP(HIS3MX6)	Y		Huh et al., 2003	Sheth and Parker 2003
yRP3239	dcp1∆ Dcp2-mCherry, Edc3-GFP	MAT alpha lys2 leu2-3,112 trp1 ura3-52 his4-539 cup1::LEU2/PGK1pG/MFA2pG dcp1::URA3 DCP2mCH:HYGB EDC3GFPNEO	Y		this study
yRP3238	dcp1∆ Dcp2-mCherry, Pat1-GFP	MAT alpha lys2 leu2-3,112 trp1 ura3-52 his4-539 cup1::LEU2/PGK1pG/MFA2pG dcp1::URA3 DCP2mCH:HYGB PAT1GFPNEO	Y		this study
yRP3240	dcp1∆ Dcp2-mCherry, Xrn1-GFP	MAT alpha lys2 leu2-3,112 trp1 ura3-52 his4-539 cup1::LEU2/PGK1pG/MFA2pG dcp1::URA3 DCP2mCH:HYGB XRN1GFPNEO	Y		this study
Supplementary references
Brengues, M., Teixeira, D., and Parker, R. 2005. Movement of eukaryotic mRNAs between polysomes and cytoplasmic processing bodies. Science 310: 486–489.
Dunckley, T., Tucker, M., and Parker, R. (2001). Two related proteins, Edc1p and Edc2p, stimulate mRNA decapping in Saccharomyces cerevisiae. Genetics 157, 27–37.
Georgiev, A., Sjostrom, M., and Wieslander, A. (2007). Binding specificities of the GYF domains from two Saccharomyces cerevisiae paralogs. Protein Eng Des Sel 20, 443-452.
Huh, W. K., Falvo, J. V., Gerke, L. C., Carroll, A. S., Howson, R. W., Weissman, J. S., and O'Shea, E. K. (2003). Global analysis of protein localization in budding yeast. Nature 425, 686–691.
Kshirsagar, M., and Parker, R. (2004). Identification of Edc3p as an enhance of mRNA decapping in Saccharomyces verevisiae. Genetics 166, 729-739.
Kurischko, C., Kim, H.K., Kuravi, V.K., Pratzka, J., and Luca, F.C. (2011). The yeast Cbk1 kinase regulates mRNA localization via the mRNA-binding protein Ssd1. J Cell Biol 192, 583-598.
Lotan, R., Bar-On, V.G., Harel-Sharvit, L., Duek, L., Melamed, D., and Choder, M. (2005). The RNA polymerase II subunit Rpb4p mediates decay of a specific class of mRNAs. Genes Dev 19, 3004–3016.
Lotan, R., Goler-Baron, V., Duek, L., Haimovich, G., and Choder, M. (2007). The Rpb7p subunit of yeast RNA polymerase II plays roles in the two major cytoplasmic mRNA decay mechanisms. J Cell Biol 178, 1133-1143.
Malys, N., and McCarthy, J.E. (2006). Dcs2, a novel stress-induced modulator of m7GpppX pyrophosphatase activity that locates to P bodies. J Mol Biol 363, 370-382.
Mitchell, S.F., Jain, S., She, M., and Parker, R. (2013). Global analysis of yeast mRNPs. Nat Struct Mol Biol 20, 127-133.
Muhlrad, D., Parker, R. (2005). The yeast EDC1 mRNA undergoes deadenylation-independent decapping stimulated by Not2p, Not4p, and Not5p. EMBO J 24,1033-1045.
Pedro-Segura, E., Vergara, S.V., Rodríguez-Navarro, S., Parker, R., Thiele, D.J., Puig, S (2008). The Cth2 ARE-binding protein recruits the Dhh1 helicase to promote the decay of succinate dehydrogenase SDH4 mRNA in response to iron deficiency. J Biol Chem 283, 28527-28535.
Rajyaguru, P., She, M., and Parker, R. (2012). Scd6 targets eIF4G to repress translation: RGG motif proteins as a class of eIF4G-binding proteins. Mol Cell 45, 244-254.
Simpson, C.E., Lui, J., Kershaw, C.J., Sims, P.F., and Ashe, M.P. (2014). mRNA localization to P bodies in yeast is bi-phasic with many mRNAs captured in a late Bfr1p-dependent wave. J Cell Sci 127, 1254-1262.
Sweet, T.J., Boyer, B., Hu, W., Baker, K.E., and Coller, J. (2007). Microtubule disruption stimulates P body formation. RNA 13, 493-502.
