# Supplementary material for: A quantitative inventory of yeast P body proteins reveals principles of composition and specificity
Source: eLife. 2020 Jun 19;9:e56525. doi: 10.7554/eLife.56525 (PMC7373430; doi:10.7554/eLife.56525)
Supplement: Supplementary file 3. [file elife-56525-supp3.xlsx]

## Sheet: Sheet1
Table 3. Protein-Protein and Protein-RNA interactions among regular P body proteins
	Protein-protein interactions	Protein-RNA interactions	Total interactions	Core or less concentrated protein in this study	Effect on P bodies when deleted	References
Dcp2	Edc3 + Pat1(10 in total), Dhh1, Edc1	1	13	Core	Increased number when deleted alone, but smaller size than dcp1∆. Smaller size in dcp1∆dcp2∆	Harigaya et al., 2010, Decker et al., 2007; Nissan et al., 2010, Dunckley et al., 2001, Charenton et al., 2017, Teixeira et al., 2007
Edc3	Dcp2, Edc3, Dhh1, Upf1, Pat1	>=1	>=6	Core	Decreased number	Harigaya et al., 2010, Decker et al., 2007, Swisher et al., 2011, Pilkington and Parker, 2008
Pat1	Pat1, Dcp2/Xrn1 (same site), Dhh1, Edc3, Lsm1-7, Upf1	1	8	Core	Smaller size	Nissan et al., 2010, Swisher et al., 2011, Pilkington and Parker, 2008, Sheth et al., 2003, Teixeira et al., 2007
Xrn1	Pat1	1	2	Core	Increased number	Nissan et al., 2010, Sheth et al., 2003
Lsm1-7	Pat1, Lsm4 Q/N domain (>=1)	1+1	4	Core	Decreased number when edc3∆	Decker et al., 2007, Sharif and Conti, 2013; Decker et al., 2007
Upf1	Pat1, Edc3, Upf2	1	4	Core	No effect	Swisher et al., 2011, Sheth et al., 2006
Dhh1	Pat1/Edc3 (same site), Dcp2, (Pop2), (Eap1)	>=1	5	Core	No effect	Nissan et al., 2010, Decker et al., 2007, Blewett and Goldstrohm, 2012, Coller et al., 2001, Rao and Parker, 2017
Pop2	CCR4, (Dhh1)	1?	3	non-core	n.d.	Coller et al., 2001, Basquin et al., 2012, Sheth et al 2003, Teixeira et al 2007
CCR4	Pop2	1?	2	non-core	No effect	Basquin et al., 2012, Teixeira et al., 2007
Not2		1	1	non-core	n.d.	Bhaskar et al., 2013, Sheth et al 2003, Teixeira et al 2007
Upf3	Upf2	1	2	non-core	Increased number	He et al., 1997, Sheth et al., 2006
Upf2	Upf1, Upf3	1	3	non-core	Increased number	Swisher et al., 2011, Sheth et al., 2006
Hek2		>=1	>=1	non-core	n.d.	Irie et al., 2002, Mitchell et al., 2003
Sbp1		>=1	>=1	non-core	Smaller size in sbp1∆ when grow to higher OD	Mitchell et al., 2013, Segal et al., 2006
Edc1	Dcp2	1	2	non-core	n.d.	Schwartz et al., 2003, Neef et al., 2009, Mugridge et al., 2018
Bre5	Bre5	1	2	non-core	n.d.	Li et al., 2005, Mitchell et al., 2013
Psp2		1	1	non-core	n.d.	Mitchell et al., 2013, Rao and Parker, 2017
Eap1	(Dhh1)	1	2	non-core	n.d.	Blewett and Goldstrohm., 2012, Mitchell et al., 2013
Ssd1		1	1	non-core	n.d.	Uesono et al., 1997, Kurischko et al., 2013
Additional P proteins found in WT strain
Dcp1	Dcp2, Edc1	1	3		Increased number when deleted alone, Smaller size in dcp1∆dcp2∆	Dunckley and Parker, 1999, Borja et al., 2011,
Pby1	(Dcp1), (Edc3)	0	2		n.d.	Krogan et al., 2006,
1) Did not consider high-throughput studies
2) Unclear if interactions between Pat1 and Upf1 is direct. Demonstrated by two-hybrid assays.
3) Lsm4 valency is unclear
4) Interactions between Dhh1 and Pop2, Dhh1 and Eap1 were demonstrated by Co-IP, unclear if the interactions are direct.
5) Hek2 has 3 RNA binding KH domains, but whether all of them interact with RNA is unclear
6) Sbp1 has 2 RRM domains, not sure if they all interact with RNA.
7) For Edc1, in dcp1∆ strain, total number of interactions is 3 since Dcp1 is lacking.
8) Pby1 interacts with Dcp1 and Edc3 based on current dara, but it is unclear if the interactions are direct

## Sheet: Sheet2
Supplementary File 3. Protein-Protein and Protein-RNA interactions among P body proteins
	Protein-protein interactions	Protein-RNA interactions	Total types of interacting molecules	Total interactions	Highly concentrated (HC) or less concentrated (LC) protein in this study	Effect on P bodies when deleted	References
Dcp2	Edc3 + Pat1(10 in total), Dhh1, Edc1, Dcp1	1	6	14	HC	Increased number when deleted alone, but smaller size than dcp1∆. Smaller size in dcp1∆dcp2∆	Harigaya et al., 2010, Decker et al., 2007; Nissan et al., 2010; Dunckley et al., 2001; Charenton et al., 2017; Teixeira et al., 2007
Edc3	Dcp2, Edc3, Dhh1, Upf1, Pat1,Pby1, Scd6	>=1	8	>=8	HC	Decreased number	Harigaya et al., 2010, Decker et al., 2007, Swisher et al., 2011; Pilkington and Parker, 2008
Pat1	Pat1, Dcp2/Xrn1 (same site), Dhh1, Edc3, Lsm1-7, Upf1, Dcp1	1	9	8	HC	Smaller size	Nissan et al., 2010, Swisher et al., 2011; Pilkington and Parker, 2008; Sheth et al., 2003; Teixeira et al., 2007
Xrn1	Pat1, Dcs1	1	3	3	HC	Increased number	Nissan et al., 2010, Sheth et al., 2003
Lsm1-7	Pat1, Lsm4 Q/N domain (>=1)	1+1	3	4	HC	Decreased number when edc3∆	Decker et al., 2007, Sharif and Conti, 2013; Decker et al., 2007
Upf1	Pat1, Edc3, Upf2, Sup45	1	5	5	HC	No effect	Swisher et al., 2011, Sheth et al., 2006
Dhh1	Pat1/Edc3 (same site), Dcp2, (Pop2), (Eap1)	>=1	6	5	HC	No effect	Nissan et al., 2010, Decker et al., 2007; Blewett and Goldstrohm, 2012; Coller et al., 2001; Rao and Parker, 2017
Pop2	CCR4, (Dhh1)	1	3	3	LC	n.d.	Coller et al., 2001, Basquin et al., 2012;; Sheth et al 2003, Teixeira et al 2007
CCR4	Pop2	1	2	2	LC	No effect	Basquin et al., 2012, Teixeira et al., 2007
Not2	Not5	1	2	2	LC	n.d.	Bhaskar et al., 2013, Sheth et al 2003, Teixeira et al 2007
Upf3	Upf2	1	2	2	LC	Increased number	He et al., 1997, Sheth et al., 2006
Upf2	Upf1, Upf3	1	3	3	LC	Increased number	Swisher et al., 2011, Sheth et al., 2006
Hek2		>=1	1	>=1	LC	n.d.	Irie et al., 2002, Mitchell et al., 2003
Sbp1		>=1	1	>=1	LC	Smaller size in sbp1∆ when grow to higher OD	Mitchell et al., 2013, Segal et al., 2006
Edc1	Dcp2, Dcp1	1	3	3	LC	n.d.	Schwartz et al., 2003, Neef et al., 2009, Borja et al., 2011
Bre5	Bre5	1	2	2	LC	n.d.	Li et al., 2005, Mitchell et al., 2013
Psp2		1	1	1	LC	n.d.	Mitchell et al., 2013, Rao and Parker, 2017
Eap1	(Dhh1), (Smy2)	1	3	3	LC	n.d.	Blewett and Goldstrohm., 2012, Mitchell et al., 2013
Ssd1		1	1	1	LC	n.d.	Uesono et al., 1997, Kurischko et al., 2013
Scd6	Edc3, Dhh1		2	2	LC	n.d.	Nissan et al., 2008
Not5	Not2	1	2	2	LC	n.d.	Bhaskar et al., 2013, Sheth et al 2003, Teixeira et al 2007
Bfr1		1	1	1	LC	increased number	Mitchell et al., 2013, Weidner et al., 2014
Scp160		1	1	1	LC	increased number	Weidner et al., 2014
Dcs1	Xrn1, Dcs2, Dcs1	1	4	4	LC	n.d.	Sinturel et al., 2012, Malys et al, 2006
Dcs2	Dcs1	1	2	2	LC	n.d.	Malys et al., 2006
Edc2		1	1	1	LC	n.d.	Schwartz et al., 2003
Rpb4	Rpb7	1	2	2	LC	increased number	Lotan et al., 2005, Armache et al., 2003
Rpb7	Rpb4	1	2	2	LC	same number of P bodies after heat stress, while in WT cells, number of P bodies decreased.	Armache et al., 2003, Lotan et al., 2007
Sup45	Upf1	1	2	2	LC	n.d.	Czaplinski et al., 1998
Smy2	(Eap1)		1	(1)	LC	n.d.	Kofler et al., 2005
Tis11		1	1	1	LC	n.d.	Puig et al., 2005
Additional P proteins found in WT strain
Dcp1	Dcp2, Edc1, Pat1	1	4	4		Increased number when deleted alone, Smaller size in dcp1∆dcp2∆	Dunckley and Parker, 1999, Borja et al., 2011,
Pby1	(Dcp1), (Edc3)	0	2	2		n.d.	Krogan et al., 2006,
1) Did not consider high-throughput studies
2) Unclear if interactions between Pat1 and Upf1 is direct. Demonstrated by two-hybrid assays.
3) Lsm4 valency is unclear
4) Interactions between Dhh1 and Pop2, Dhh1 and Eap1, and Eap1 and Smy2 were demonstrated by Co-IP, unclear if the interactions are direct.
5) Hek2 has 3 RNA binding KH domains, but whether all of them interact with RNA is unclear
6) Sbp1 has 2 RRM domains, not sure if they all interact with RNA.
7) For Edc1, in dcp1∆ strain, total number of interactions is 3 since Dcp1 is lacking.
8) Pby1 interacts with Dcp1 and Edc3 based on current dara, but it is unclear if the interactions are direct
Supplementary reference
Armache, K. J., Kettenberger, H., & Cramer, P. (2003). Architecture of initiation-competent 12-subunit RNA polymerase II. Proc Natl Acad Sci U S A 100, 6964–6968.
Basquin, J., Roudko, V.V., Rode, M., Basquin, C., Seraphin, B., and Conti, E. (2012). Architecture of the nuclease module of the yeast Ccr4-not complex: the Not1-Caf1-Ccr4 interaction. Mol Cell 48, 207-218.
Bhaskar, V., Roudko, V., Basquin, J., Sharma, K., Urlaub, H., Seraphin, B., and Conti, E. (2013). Structure and RNA-binding properties of the Not1-Not2-Not5 module of the yeast Ccr4-Not complex. Nat Struct Mol Biol 20, 1281-1288.
Blewett, N.H., and Goldstrohm, A.C. (2012). A eukaryotic translation initiation factor 4E-binding protein promotes mRNA decapping and is required for PUF repression. Mol Cell Biol 32, 4181-4194.
Borja, M.S., Piotukh, K., Freund, C., and Gross, J.D. (2011). Dcp1 links coactivators of mRNA decapping to Dcp2 by proline recognition. RNA 17, 278-290.
Coller, J. M., Tucker, M., Sheth, U., Valencia-Sanchez, M. A., & Parker, R. (2001). The DEAD box helicase, Dhh1p, functions in mRNA decapping and interacts with both the decapping and deadenylase complexes. RNA 7, 1717–1727.
Czaplinski, K., Ruiz-Echevarria, M. J., Paushkin, S. V., Han, X., Weng, Y., Perlick, H. A., Dietz, H. C., Ter-Avanesyan, M. D., & Peltz, S. W. (1998). The surveillance complex interacts with the translation release factors to enhance termination and degrade aberrant mRNAs. Genes Dev 12, 1665–1677.
He, F., Brown, A. H., & Jacobson, A. (1997). Upf1p, Nmd2p, and Upf3p are interacting components of the yeast nonsense-mediated mRNA decay pathway. Mol Cell Biol 17, 1580–1594.
Irie, K., Tadauchi, T., Takizawa, P. A., Vale, R. D., Matsumoto, K., and Herskowitz, I. (2002). The Khd1 protein, which has three KH RNA-binding motifs, is required for proper localization of ASH1 mRNA in yeast. EMBO J 21, 1158–1167.
Kofler, M., Motzny, K., & Freund, C. (2005). GYF domain proteomics reveals interaction sites in known and novel target proteins. Mol Cell Proteomics 4, 1797–1811.
Li, K., Zhao, K., Ossareh-Nazari, B., Da, G., Dargemont, C., and Marmorstein, R. (2005). Structural basis for interaction between the Ubp3 deubiquitinating enzyme and its Bre5 cofactor. J Biol Chem 280, 29176-29185.
Neef, D.W., and Thiele, D.J. (2009). Enhancer of decapping proteins 1 and 2 are important for translation during heat stress in Saccharomyces cerevisiae. Mol Microbiol, 73, 1032–1042.
Nissan, T., Rajyaguru, P., She, M., Song, H., and Parker, R. (2010). Decapping activators in Saccharomyces cerevisiae act by multiple mechanisms. Mol Cell 39, 773-783.
Pilkington, G.R., and Parker, R. (2008). Pat1 contains distinct functional domains that promote P body assembly and activation of decapping. Mol Cell Biol 28, 1298-1312.
Puig, S., Askeland, E., & Thiele, D. J. (2005). Coordinated remodeling of cellular metabolism during iron deficiency through targeted mRNA degradation. Cell 120, 99–110.
Schwartz, D., Decker, C. J., and Parker, R. (2003). The enhancer of decapping proteins, Edc1p and Edc2p, bind RNA and stimulate the activity of the decapping enzyme. RNA 9, 239–251.
Sinturel, F., Bréchemier-Baey, D., Kiledjian, M., Condon, C., & Bénard, L. (2012). Activation of 5'-3' exoribonuclease Xrn1 by cofactor Dcs1 is essential for mitochondrial function in yeast. Proc Natl Acad Sci U S A 109, 8264–8269.
Swisher, K.D., and Parker, R. (2011). Interactions between Upf1 and the decapping factors Edc3 and Pat1 in Saccharomyces cerevisiae. PLoS One 6, e26547.
Uesono, Y., Toh-e, A., and Kikuchi, Y. (1997). Ssd1p of Saccharomyces cerevisiae Associates with RNA. J Biol Chem 272, 16103-16109.
Weidner, J., Wang, C., Prescianotto-Baschong, C., Estrada, A.F., and Spang, A. (2014). The polysome-associated proteins Scp160 and Bfr1 prevent P body formation under normal growth conditions. J Cell Sci 127, 1992-2004.
